# 1 Nuclear Lamins A/C and B1 Provide a 2 Structural Framework That 3 Organizes and Anchors Nuclear Pore 4 Complexes

5 **Mark Kittisopikul<sup>1,2†</sup>, Takeshi Shimi<sup>1,3†‡</sup>, Meltem Tatli<sup>4</sup>, Joseph R. Tran<sup>5</sup>, Yixian  
6 Zheng<sup>5</sup>, Ohad Medalia<sup>4</sup>, Khuloud Jaqaman<sup>2,6</sup>, Stephen A. Adam<sup>1</sup>, Robert D.  
7 Goldman<sup>1</sup>**

**\*For correspondence:**

[r-goldman@northwestern.edu](mailto:r-goldman@northwestern.edu) (RDG)

<sup>†</sup>These authors contributed  
equally to this work

**Present address:** <sup>‡</sup> IIR Advanced  
Research Center for Cell Biology,  
Tokyo Institute of Technology,  
Yokohama, Kanagawa, Japan  
226-8503

8 <sup>1</sup>Department of Cell and Developmental Biology, Feinberg School of Medicine,  
9 Northwestern University, Chicago, IL; <sup>2</sup>Department of Biophysics, UT Southwestern  
10 Medical Center, Dallas, TX; <sup>3</sup>Cell Biology Center and World Research Hub Initiative,  
11 Institute of Innovative Research, Tokyo Institute of Technology, Yokohama, Japan;  
12 <sup>4</sup>Department of Biochemistry, University of Zurich, Zurich, Switzerland; <sup>5</sup>Department of  
13 Embryology, Carnegie Institution for Science, Baltimore, MD; <sup>6</sup>Lyda Hill Department of  
14 Bioinformatics, UT Southwestern Medical Center, Dallas, TX

15  
16 **Abstract** Nuclear lamin isoforms assemble into fibrous meshworks within the nuclear lamina  
17 (NL) where they are associated with nuclear pore complexes (NPCs). Although the lamins and  
18 NPCs are major components of the nuclear envelope (NE), little is known about their structural  
19 relationships. We used 3D structured illumination microscopy (3D-SIM) and sub-pixel image  
20 analysis to show that NPCs are closely associated with lamin fibers in mouse embryonic  
21 fibroblasts (MEFs). When lamin A/C (LA/C) or lamin B1 (LB1) are removed by gene knockout, the  
22 NPCs retained their association and redistributed with the resulting enlarged lamin meshworks.  
23 Cryo-ET revealed that more LA/C than LB1 fibers contacted the nucleoplasmic ring of NPCs.  
24 Knockdown of the outer ring nucleoporin ELYS induced NPC clusters that excluded LA/C fibers.  
25 Knockdown of the basket nucleoporin TPR reduced the size of LA/C, LB1, and LB2 meshworks  
26 while retaining their close association with NPCs. NUP153 knockdown reduced LA/C and B2  
27 meshwork size in wild type (WT) MEFs and caused NPC clustering in nuclei lacking LB1. Therefore,  
28 lamins and nucleoporins act together to maintain the organization and distribution of lamin  
29 meshworks and NPCs.

## 31 Introduction

32 Two major components of the nuclear envelope (NE) are the type V intermediate filament pro-  
33 teins, the nuclear lamins, and nuclear pore complexes (NPCs) (*Aebi et al., 1986; Fisher et al., 1986;*  
34 *Goldman et al., 1986; McKeon et al., 1986*). The four lamin isoforms LA, LC, LB1, and LB2 are mainly  
35 associated with the inner nuclear membrane where they assemble into discrete meshworks of  
36 fibers composing the nuclear lamina (NL). The NPCs penetrate the NE forming transport passage-  
37 ways delineated by the fusion of the inner and outer nuclear membranes, thereby allowing for  
38 bidirectional transport across the NE. They are composed of multiple copies of 30 proteins known

39 as nucleoporins (*Beck and Hurt, 2016*). Both the nuclear lamins and NPC structures are closely  
40 associated with chromatin at the nuclear periphery (*Guelen et al., 2008; Peric-Hupkes et al., 2010;*  
41 *Ibarra and Hetzer, 2015*).

42 The lamins are classified as A-type (LA, LC) and B-type (LB1, LB2). LA and LC are derived from  
43 the *Lmna* gene by alternative splicing (*Lin and Worman, 1993*), whereas LB1 and LB2 are encoded  
44 by *Lmnb1* and *Lmnb2*, respectively (*Höger et al., 1990; Biamonti et al., 1992; Lin and Worman, 1995;*  
45 *Maeno et al., 1995*). Lamins assemble into a 13.5 nm thick layer composed of 3.5 nm diameter  
46 filaments underlying the inner nuclear membrane in mouse embryo fibroblast (MEF) nuclei (*Tur-*  
47 *gay et al., 2017*). Using three-dimensional structured illumination microscopy (3D-SIM) combined  
48 with computer vision analysis, we demonstrated that these lamin filaments, termed fibers in the  
49 light microscope, are non-randomly organized into complex interwoven meshworks within the NL  
50 (*Shimi et al., 2015; Turgay et al., 2017*). Notably, each lamin isoform appears to assemble into a  
51 distinct meshwork, each with a similar structural organization (*Shimi et al., 2015*). However, the  
52 meshworks formed by individual lamin isoform fibers are significantly expanded in size in *Lmna* or  
53 *Lmnb1* knockout (KO) MEF nuclei compared to the lamin meshworks in WT or *Lmnb2* KO MEF nu-  
54 clei demonstrating that LA/C and LB1 interactions are required for normal lamin fiber meshwork  
55 structure in WT MEFs (*Shimi et al., 2015*).

56 For many years, it has been apparent that there are structural interactions between the NL  
57 and the NPCs of eukaryotic nuclei. The earliest studies on identification of components of the  
58 NE identified a cell free NPC-NL fraction that could be isolated under fairly stringent conditions  
59 suggesting a strong physical association between these major NE components (*Kay et al., 1972;*  
60 *Dwyer and Blobel, 1976; Scheer et al., 1976; Aebi et al., 1986*). In addition, both lamins and the  
61 NPCs are relatively immobile in the plane of the NE indicating that both are anchored in some  
62 fashion (*Broers et al., 1999; Moir et al., 2000; Rabut et al., 2004*). Thin section electron microscopy  
63 studies of the NE have shown that the NPCs are located in spaces where both the lamina and  
64 heterochromatin appear to be discontinuous (*Fawcett, 1966; Ou et al., 2017*). Our previous study  
65 by cryo-ET also supports the close association of lamin filaments with the NPCs (*Turgay et al.,*  
66 *2017; Tatli and Medalia, 2018*) and biochemical results have shown interactions between lamins  
67 and a subset of specific nucleoporins (*Hase and Cordes, 2003; Krull et al., 2004; Al-Haboubi et al.,*  
68 *2011*). More recently, proximity-dependent biotin identification, BioID, recognized several lamin-  
69 associated nucleoporins including Nup153, ELYS and TPR (*Roux et al., 2012; Xie et al., 2016*). These  
70 nucleoporins localize to the nucleoplasmic aspect of NPCs which lie in close proximity to the NL  
71 (*Walther, 2001; Rasala et al., 2008*). The distribution of NPCs is nonrandom with characteristic  
72 center to center spacing varying according to species ranging from human to frog (*Maul, 1977*).  
73 Furthermore, removal of all lamins from mouse MEFs or mESC derived fibroblast-like cells leads  
74 to clustering of the NPCs, which can be rescued by re-expression of either A or B-type lamins (*Guo*  
75 *and Zheng, 2015*). These observations suggest that lamins play an important role in regulating the  
76 distribution of NPCs.

77 Although the extant evidence strongly suggests that lamins interact with nucleoporins to an-  
78 chor the NPCs in the NE, the specific lamins involved in this anchorage remain unknown. In this  
79 study, we investigate the structural relationships between each lamin isoform fiber meshwork and  
80 NPCs at nanoscale precision using 3D-SIM with newly developed computational procedures for  
81 sub-pixel quantitative image analysis. This quantitative approach is necessitated by the complex-  
82 ity of the four lamin fiber meshworks and NPCs located within a thin layer at the nuclear surface.  
83 The results of our analyses demonstrate that NPCs are closely associated with lamin fibers. At  
84 higher resolution cryo-ET confirms that both LA/C and LB1 filaments interact closely with the NPCs  
85 at the nucleoplasmic ring. Targeted disruption of nucleoporins and lamin isoforms demonstrates  
86 the interdependence of the spatial distributions of lamin fibers and NPCs.

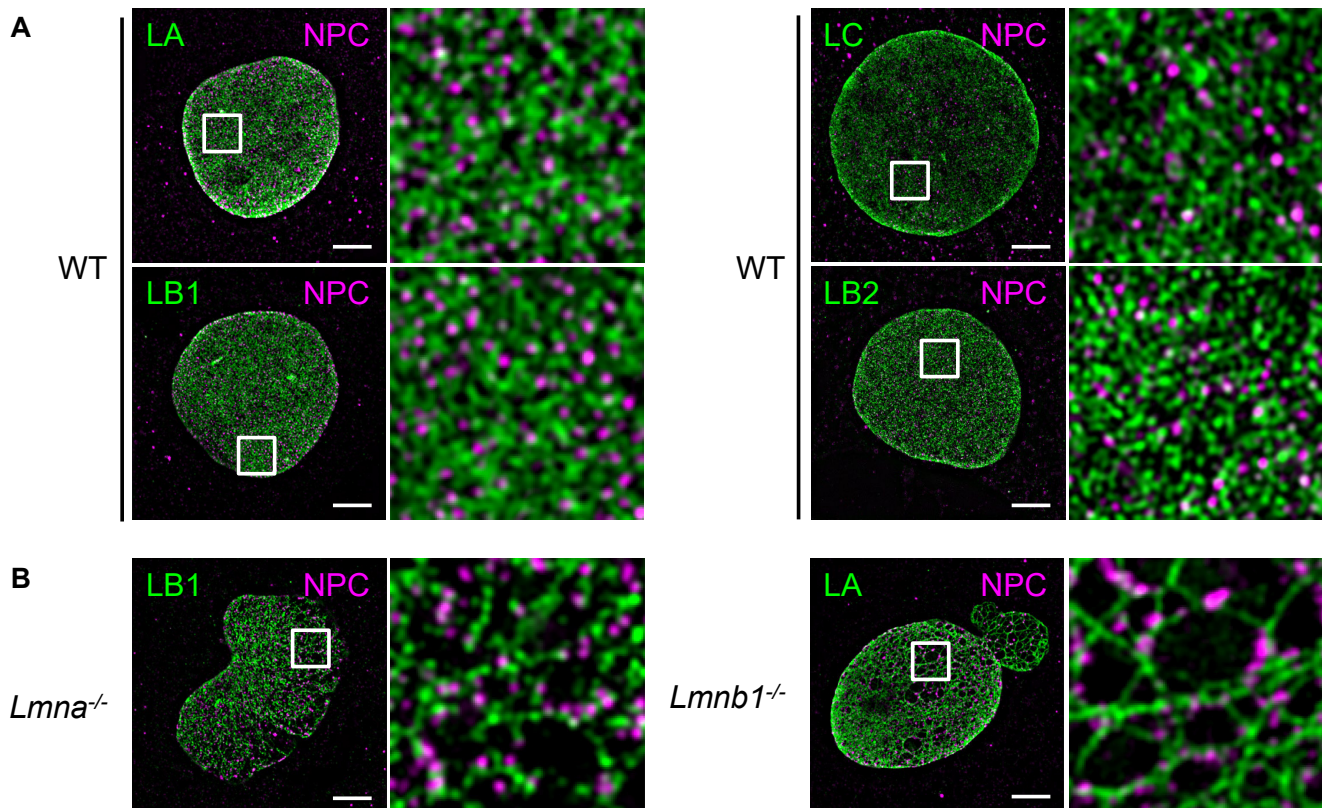

**Figure 1.** Co-Distribution of Lamin Fibers and NPCs. Colabeling of lamins and nuclear pore complexes in wt and lamin KO MEF nuclei using indirect immunofluorescence with a pair of specific antibodies against each lamin isoform (LA, LB1, LB2 or LC) and the FXFG-repeat nucleoporins. A) wt MEF nuclei colabeled with the indicated lamin isoform and FXFG-repeated nucleoporins. B) Nuclei of *Lmna*<sup>-/-</sup> (left pair) and *Lmb1*<sup>-/-</sup> (right pair) MEFs. The indicated areas with white squares are enlarged approximately eight-fold along each edge and displayed on right side of each pair of images. Scale bar = 5  $\mu$ m.

## 87 Results

### 88 NPCs are structurally linked to lamin fibers

89 We used 3D-SIM and image reconstruction to determine the structural relationships among  
90 immunolabeled lamin fiber meshworks and NPCs in MEFs. NPCs in WT MEFs were distributed  
91 all across the NL region, but did not show an obvious co-localization with any of the lamin mesh-  
92 works, as indicated by the very few white areas in merged overlays (Figure 1A). This was remarkable  
93 because some co-localization of lamins and NPCs would be expected by chance given the densely  
94 packed environment of the NL. This lack of co-localization between lamins and NPCs suggested the  
95 existence of a bona fide spatial relationship. We took advantage of our previous finding that the  
96 spaces or “faces” delineated by lamin fibers comprising the meshworks increase in size in *Lmna*<sup>-/-</sup>  
97 and *Lmb1*<sup>-/-</sup> MEF nuclei (*Shimi et al., 2015*). This allowed us to examine the association between  
98 NPCs and specific lamin isoforms in WT, *Lmna*<sup>-/-</sup>, and *Lmb1*<sup>-/-</sup> MEFs. Importantly, NPCs remained  
99 in close proximity to the LA and LB1 fibers in the expanded meshworks of *Lmna*<sup>-/-</sup> and *Lmb1*<sup>-/-</sup> MEF  
100 nuclei and were absent in the meshwork faces (Figure 1B). These results strongly suggest that LA  
101 and LB1 are required for the normal distribution of NPCs. Although these images provide qualita-  
102 tive evidence that there is an association between lamin isoform fibers and NPCs, it is important to  
103 verify such associations using a quantitative approach to ascertain the extent of the relationships  
104 between each lamin fiber isoform and NPCs.

## 105 **Image analysis reveals specific spatial relationships between lamin fibers and NPCs**

106 We developed quantitative image analysis tools to precisely determine the spatial relationships  
107 between lamin isoform fibers and NPCs, and to localize both structures with sub-pixel precision in  
108 dense and sparse lamin meshworks (Figure 2A; details of analysis tools in Materials and Methods).  
109 We reasoned that by measuring the distances between the centers of lamin fibers and the center  
110 of lamin meshwork faces to the centers of NPCs (Figure 2 – Figure Supplement 1), we could quan-  
111 titatively assess the association of NPCs with individual lamin isoforms. To evaluate the frequency  
112 of observing distances between the lamin fibers or face centers and NPCs by chance, we com-  
113 pared our observed distance measurements to the expected distances under a null hypothesis,  
114 which assumes the NPCs and lamin meshworks have no relationship and are thus independently  
115 distributed. For example, we measured the LA fiber center to NPC center distance in WT cells as  
116 compared to the expected distances assuming no relationship (Figure 2B compare the measured  
117 data in the blue violin plot on top vs the expected distances in the red violin plots on bottom). By  
118 examining the difference in the observed from the expected distributions (Figure 2C), we could see  
119 a paucity (green) or excess (purple) of NPCs at certain distances from the centers of LA fibers. For  
120 example, in a single WT nucleus we observed fewer NPCs within 30 nm of the fibers and an excess  
121 of NPCs between 30 and 100 nm relative to the null hypothesis (green area; Figure 2C WT). In  
122 order to validate this approach, we performed the same analysis of the LA fiber to NPC distance in  
123 a single *Lmnb1*<sup>-/-</sup> MEF nucleus (Figure 2B). As in the WT nucleus, we saw an excess of NPCs between  
124 30 and 100 nm in the *Lmnb1*<sup>-/-</sup> nucleus (Figure 2C). This agreed with the qualitative observation  
125 that the NPCs were associated with, but not co-localized with lamin fibers (Figure 1A,B, 2A).

126 Measuring the distance from the lamin face centers to NPCs allowed us to more precisely de-  
127 termine how NPCs are related to the lamin fibers. The faces are delineated by the lamin fibers  
128 composing the lamin isoform meshwork (Figure 2A; *Shimi et al. (2015)*). Their centers are points  
129 that are locally the most distant from the lamin fibers. This analysis also allowed us to account  
130 for changes in face size such as the enlargement seen in *Lmnb1*<sup>-/-</sup> or *Lmna*<sup>-/-</sup> nuclei (Figures 1B, 2A).  
131 Measuring both the distances of the NPCs to the lamin fibers and the centers of the faces, allowed  
132 us to examine a 2D bivariate statistical distribution in a single nucleus (Figure 2 – Figure Supplement  
133 1). To explore if the NPCs also had a relationship with the center of the faces, we found the points  
134 the most distant from the lamin fibers within a local area (white Xs, Figure 2A). For a circle, this  
135 would be the center, but other shapes may have multiple centers (see Methods). We measured  
136 the distances between the center of the NPCs and the center(s) of the faces (Figure 2 - Figure Sup-  
137 plement 1 G) and then compared that distribution to the null hypothesis (Figure 2D, E). In both  
138 the WT and the *Lmnb1*<sup>-/-</sup> nucleus, we observed median distances that were smaller than expected.  
139 This means that the NPCs were closer to the center of the faces than expected by chance. This is  
140 consistent with the observation that NPCs did not directly colocalize with the lamin fibers, but had  
141 a lateral proximal relationship.

142 We combined the distances of the NPCs to the lamin fibers and the distances of the NPCs from  
143 the face centers into two-dimensional histograms to represent the bivariate distribution (Figure 2  
144 - Figure Supplement 1). The two-dimensional histograms showed that there was an expectation  
145 that NPCs would be near the LA fibers and away from the faces by chance in a broad distribution.  
146 However, the NPCs were offset from the LA fibers in a narrower than expected distribution (Figure  
147 2 - Figure Supplement 1A-F). In the WT MEFs, the negative correlation between the distances was  
148 also apparent, which is expected since the NPCs that are farther from the lamin fibers tend to be  
149 closer to the face centers (Figure 2 Supplement 1A, B). However, the two-dimensional histograms of  
150 single nuclei were sparse and noisy indicating that additional distance measurements were needed  
151 for evaluation.

152 The localizations of both lamin fibers and NPCs were based on finding local maxima within the  
153 continuous reconstruction of the fluorescence intensity from critically sampled 3D-SIM images and  
154 was not dependent on rounding to the nearest pixel (See Methods and Supplement; Kittisopikul et

155 al. BioRxiv 2019). Here we focused on localizing lamin fibers and NPCs resolved by 3D-SIM, and not  
156 their specific molecular components consisting of individual 3.5 nm lamin filaments *Turgay et al.*  
157 (2017) and/or specific nucleoporins. Furthermore, we measured the distance between structures  
158 localized within two channels separated by their chromatic properties, and thus these distance  
159 measurements were not limited by resolution (*Stelzer, 1998*). The main limitations to the preci-  
160 sion of the localization and distance measurements are the inaccuracy of indirect immunofluores-  
161 cence labeling, signal-to-noise ratio, and structured illumination microscopy reconstruction artifacts.  
162 This was mitigated by examining the distribution of tens of thousands of distance measurements.  
163 These analyses permitted us to express the magnitude of differences in the co-distributions, or the  
164 lack thereof, in terms of nanometers with high statistical power (see Appendix 1).

### 165 **The association between lamin fibers and NPCs is isoform dependent**

166 We previously found that the four main lamin isoforms (LA, LC, LB1, and LB2) form independent  
167 meshworks (*Shimi et al., 2015*), and we sought to see if each isoform had a distinct relationship  
168 with NPCs.

169 Having established our approach to analyzing lamin-NPC associations, we measured the dis-  
170 tances between the center of individual NPCs and the center of the nearest lamin fiber across the  
171 surface closest to the coverslip of 10 WT nuclei for each lamin isoform. Overall, the data obtained  
172 supports the lack of direct colocalization between NPCs and lamin fibers, which we observed qual-  
173 itatively and quantitatively in single nuclei (Figures 1, 2). The median distances from the centers of  
174 NPCs to the centers of LA fibers (40.4 nm;  $p < 0.001$ ; Table 1A, Figure 3A, Figure 3 – Figure Supple-  
175 ment 1A) and to the centers of LB1 fibers (38.1 nm;  $p < 0.001$ ; Table 1A, Figure 3A) were similar. The  
176 observed median distances were 6 nm greater than the expected distribution (+6.9 nm LA; +6.0  
177 nm LB1; Table 1A, Figure 3A, B; Figure 3 – Figure Supplement 1C). The expected distribution rep-  
178 represents the distances between NPCs and lamins that we would expect under the null hypothesis  
179 that there is no relationship between the position of NPCs and lamins. It was calculated by a Monte  
180 Carlo simulation randomly placing a NPC within the segmented area of the nucleus. The median  
181 distance between NPCs and the center of faces in the LA meshworks was similar (119.3 nm; -11.7  
182 nm vs expected;  $p < 0.001$ ; Table 1B) or LB1 (118.3 nm; -10.8 nm vs expected;  $p < 0.001$ ; Table 1B)  
183 and both median distances were less than expected if the lamins and NPCs were not associated  
184 (Figure 3C; Table 1B). These data show that NPCs and LA or LB1 fibers are not directly colocalized,  
185 but have a proximal lateral relationship. These findings suggest that NPCs and LA or LB1 fibers are  
186 structurally linked within the NL.

187 In contrast to the relationships between the NPCs and LA or LB1, the median distance from LC  
188 fibers to NPC centers did not differ significantly from expected (32.8 nm observed, + 0.7 nm vs ex-  
189 pected;  $p = 0.37$ ; Table 1A, Figure 3A, Figure 3 – Figure Supplement 1B). Also, the standard deviation  
190 of distances between LC fibers and NPCs (35.0 nm observed, -14.5 nm vs expected;  $p = 0.01$ ; Table  
191 1A, Figure 3A) was not significant when using a Bonferonni corrected alpha level. While the p-value  
192 of 0.01 is smaller than the traditional alpha level of 0.05, we conducted multiple comparisons and  
193 thus need to compensate for Type I error. The Bonferonni correction of the alpha level across the  
194 12 pairs of distributions compared in Tables 1A and 1B leads to an alpha level of  $0.05/12 \approx 0.004$ .  
195 However, the median distance determined for the NPC center to LC face center differed from the  
196 expected distribution (122.4 nm observed, -3.3 nm vs expected;  $p < 0.001$ ; Table 1B, Figure 3C).  
197 While these measurements followed a pattern similar to that detected for LA and LB1, the mag-  
198 nitude of the differences were much smaller for LC (Figure 3C, D, Table 1B). Overall, these data  
199 suggested that the offset between NPCs and LC fibers is closer (median: 32.8 nm) than between  
200 NPCs and LA or LB1 fibers (medians: 40 nm). However, given the small differences in the LC fiber  
201 to NPC center measurements relative to expected, we cannot completely reject the null hypothesis  
202 for the LC fiber to NPC distances.

203 The relationship between LB2 fibers and NPCs in WT MEFs differed from the other lamin iso-  
204 forms. We observed a statistically significant difference in medians from expected distributions

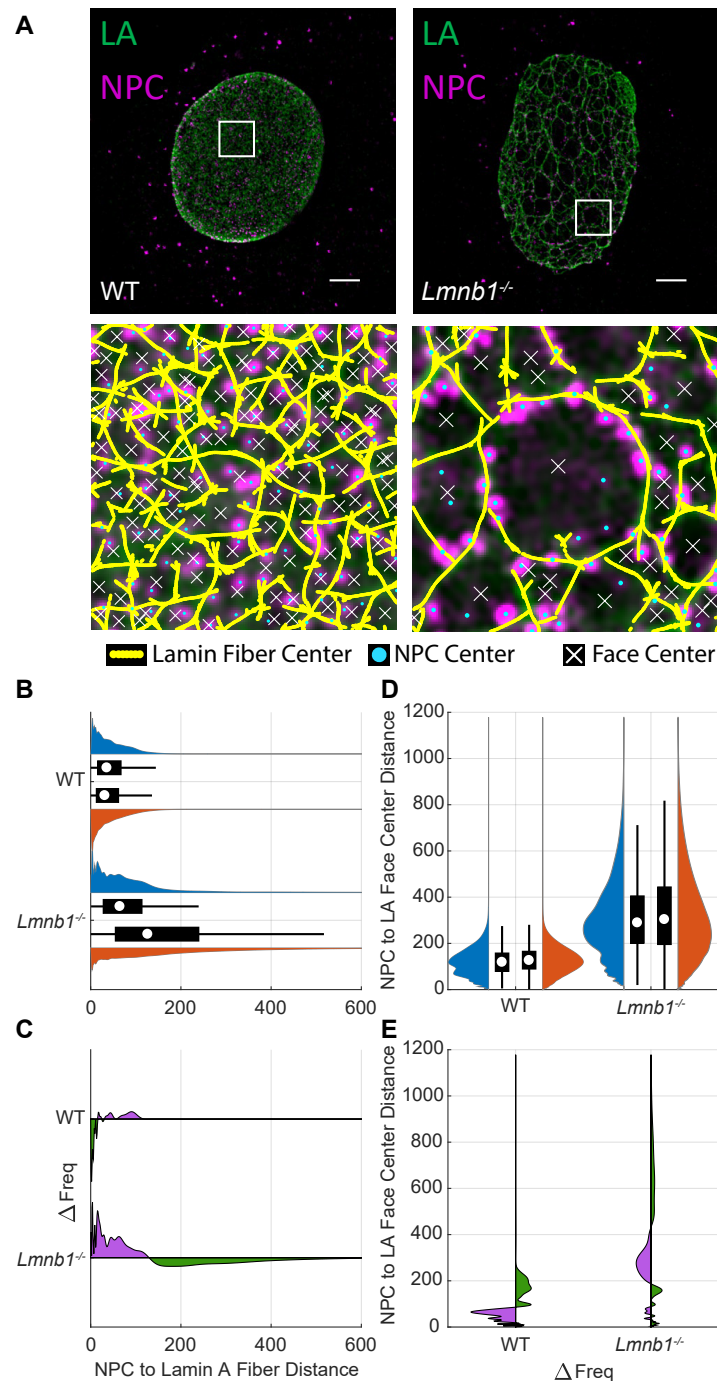

**Figure 2.** Computational Image Analysis of Lamin A and NPCs in Individual Nuclei A) Immunofluorescence images labeling LA (green) and NPCs (magenta) of wt and *Lmnb1*<sup>-/-</sup> MEF nuclei as in Figure 1 were subjected to computational image analysis. White boxes in the top row are magnified 8 times along each edge. The centers of LA fibers (yellow dots), NPCs (cyan dots), and faces (white Xs) were segmented to subpixel precision. Scale bar is 5  $\mu$ m. B) Paired violin and box plots of NPC to LA fiber distances for the nuclei in (A). The violin (blue) and box plots on top represent the observed distance distributions. The violin (red) and box plots on bottom represent the expected distance distributions under the null hypothesis. The white circle indicates the median. The thick black bar indicates the interquartile range (IQR). The black whiskers indicate 1.5 times the IQR. C) Frequency difference plot of observed minus expected LA fiber to NPC distances. The green portion below the line indicates where the observed frequency is less than expected. The purple portion above the line indicates where the observed frequency is greater than expected. D) NPC to LA face center distances displayed as in (B), rotated 90 degrees counterclockwise. E) Frequency difference plot of NPC to LA face center distances, displayed as in (C), rotated 90 degrees counterclockwise.

**Figure 2-Figure supplement 1.** Bivariate histograms of LA Fiber-NPC and Face Center-NPC Distances in Single Nuclei. Illustration of Distances.

205 between the centers of LB2 fibers and NPCs (27.6 nm observed; -0.6 nm vs expected;  $p < 0.001$ ;  
206 Table 1A, Figure 3A, Figure 3 - Figure Supplement 1D). However, the shift was an order of magni-  
207 tude less and in the opposite direction than observed for LA and LB1 fibers. The median distance  
208 from NPCs to LB2 face centers (116.7 nm observed; -0.6 nm vs expected; Table 1A, Figure 3C) was  
209 not significantly different from expected. These findings suggest that there is no obvious relation-  
210 ship between the distribution of LB2 fibers and the distribution of NPCs, or if there is, it cannot be  
211 discerned in our analyses.

### 212 **Knocking out *Lmna* affects the LB1-NPC relationship more than knocking out *Lmnb1*** 213 **affects the LA-NPC relationship**

214 The results presented in the previous section showed a clear spatial relationship between both  
215 LA and LB1 fibers and NPCs in the dense meshworks of WT MEF nuclei. The removal of either  
216 LA/C or LB1 by gene knockout in MEFs leads to dramatic changes in the remaining lamin mesh-  
217 work characteristics, most notably an increase in the lamin mesh size (Figure 1B and Shimi et al  
218 2015). Because the lamin fibers have close structural relationships with NPCs, we next wanted to  
219 determine if these relationships are altered when the lamin meshwork structure changes.

220 We analyzed the spatial relationships between LA fibers and NPCs in 10 *Lmnb1*<sup>-/-</sup> nuclei using  
221 the same quantitative methods applied to our studies of WT nuclei. In *Lmnb1*<sup>-/-</sup> nuclei, there was  
222 a greater median distance between LA fiber centers and NPC centers than expected (45.1 nm ob-  
223 served; +2.7 nm vs expected; Table 1A, Figure 3A, Figure 3 - Figure Supplement 2A), however, this  
224 shift in medians was not statistically significant ( $p = 0.59$ , Table 1A). Interestingly a statistical test  
225 comparing the standard deviations showed that the distributions are significantly different (48.6  
226 nm observed; -168.2 nm vs expected;  $p < 0.001$ ; Table 1A, Figure 3A, B). This reflects the long tail of  
227 the expected distributions, since under the null hypothesis some NPCs may appear in the middle  
228 of the faces of the enlarged LA meshworks, that is, farther away from the lamin fibers. The median  
229 distance of NPCs from the LA face centers was less than expected by a large magnitude (124.0 nm;  
230 -22.0 nm vs expected;  $p < 0.001$ ; Table 1B; Figure 3C, D). This difference is due to the distribution of  
231 the offsets of the NPCs from the lamin fibers, which is larger than the expected offset distributions  
232 where more NPCs were closer to the lamin fibers. The observed distance distributions of WT and  
233 *Lmnb1*<sup>-/-</sup> MEFs (Figure 3A) both differ from the expected distributions under the null hypothesis in  
234 a similar manner (Figure 3B). This indicates that in *Lmnb1*<sup>-/-</sup> nuclei the proximal lateral relationship  
235 between LA fibers and NPCs remains although the median distance between LA fibers and NPCs  
236 increased by 5 nm. Overall, this suggests that the distance between the centers of LA fibers and  
237 NPCs does not depend strongly on the presence of LB1 fibers.

238 The results showed a relationship similar to LA fibers in WT MEFs for distances less than 30 nm  
239 where NPCs occurred less frequently than expected (green area; Figure 3B) and more frequently  
240 than expected around 50-100 nm (purple area; Figure 3B). This differed from the analysis of the  
241 single nucleus which consisted mostly of enlarged faces (Figure 2A), whereas most nuclei typically  
242 had a mix of small and large faces (Figure 1B).

243 Interestingly, the median distances between the centers of LB1 fibers and NPCs in *Lmna*<sup>-/-</sup> MEFs  
244 matched the expected distribution (34.9 nm observed; -0.8 vs expected;  $p < 0.001$ ; Table 1A, Fig-  
245 ure 3 A,B, Figure 3 - Figure Supplement 2B). Recall that in contrast, the LB1 fiber to NPC median  
246 distances in WT MEFs were slight larger and differed from the expected (38.1 nm;  $p < 0.001$ ; Table  
247 1A, Figure 3A). Additionally, the difference between the frequencies of the observed and expected  
248 distributions were smaller in magnitude in *Lmna*<sup>-/-</sup> MEFs compared to WT MEFs along with a small  
249 positive peak suggesting some colocalization (Figure 3B). The standard deviation of LB1 fiber to  
250 NPC medians in *Lmna*<sup>-/-</sup> MEFs did differ significantly from expected (34.9 nm observed; -263.1 nm  
251 vs expected;  $p < 0.01$ ; Table 1A, Figure 3A, B) reflecting the enlarged faces in *Lmna*<sup>-/-</sup> MEFs. LB1 face  
252 center to NPC center distances were significantly different from expected with a large change in  
253 magnitude (122.1 nm observed; -11.1 nm vs expected;  $p < 0.001$ ; Table 1B, Figure 3C, D). As in WT  
254 MEFs, this reflects a lateral proximal relationship between LB1 fibers and NPCs in *Lmna*<sup>-/-</sup> MEFs.

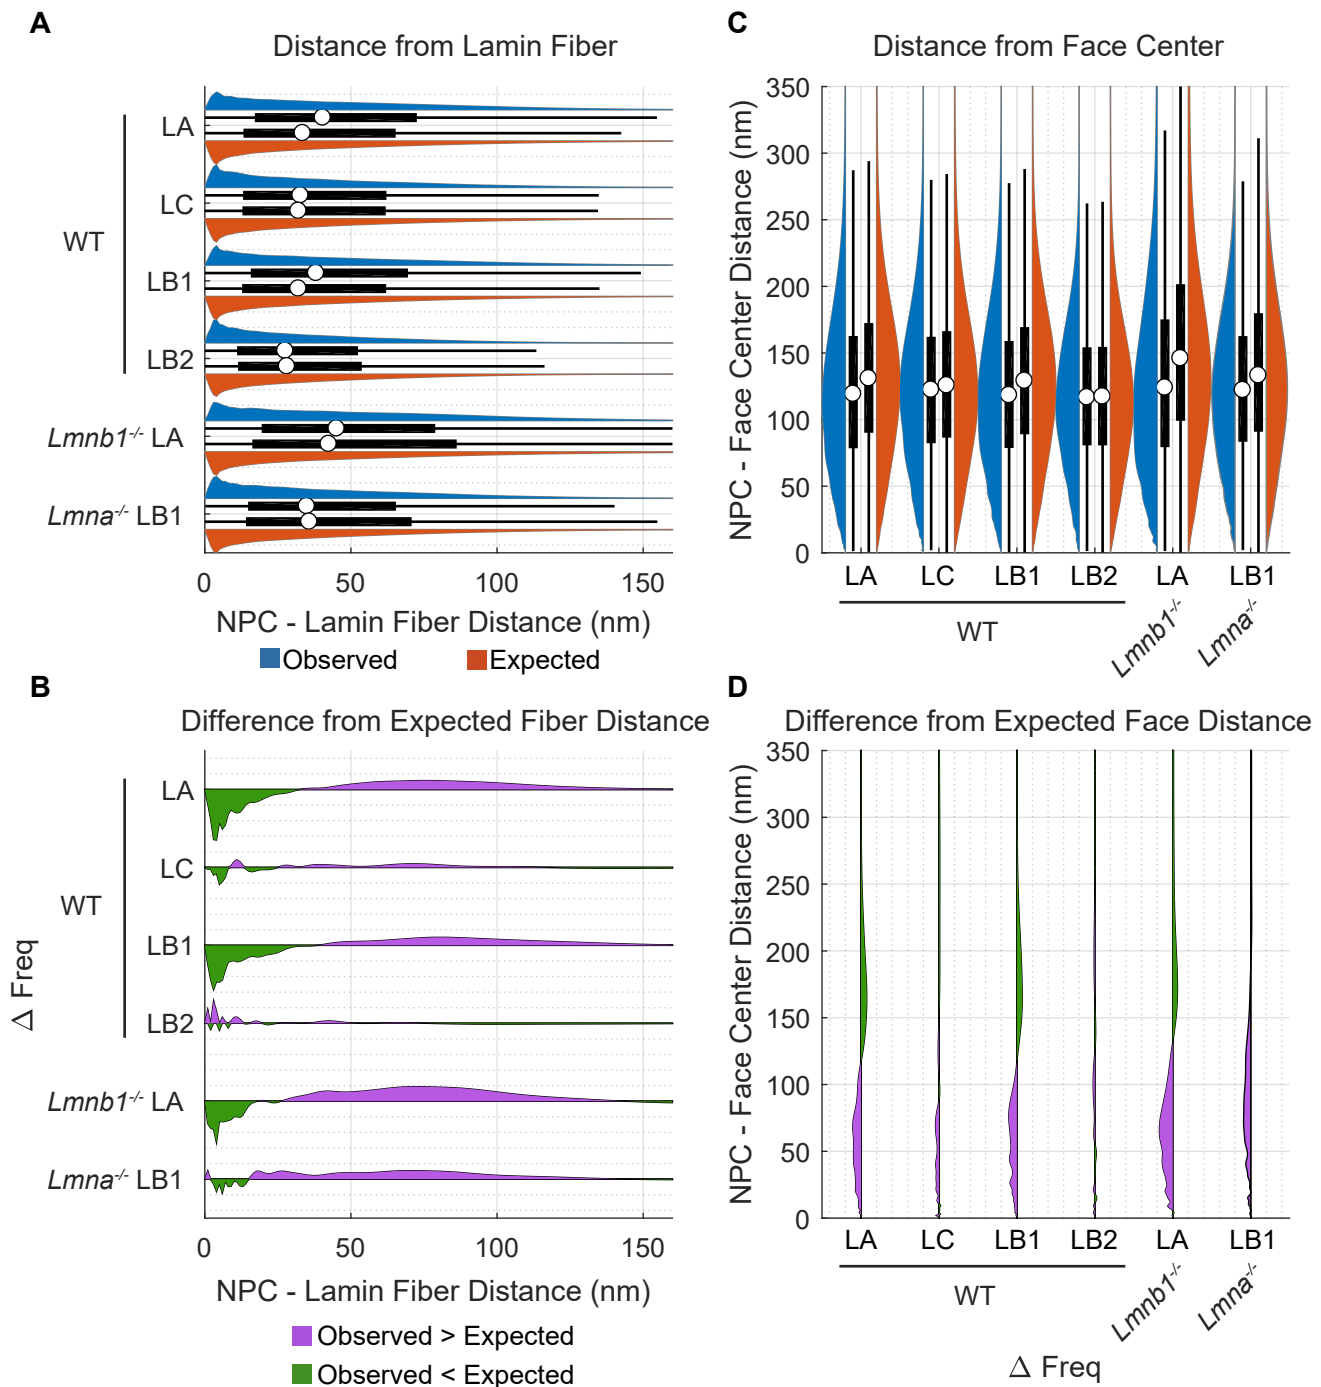

**Figure 3.** Quantitative Analysis of Lamin-NPC Distances A) Paired violin and box plots of NPC to lamin fiber distances. The violin (blue) and box plots on top represent the observed distance distributions. The violin (red) and box plots on bottom represent the expected distance distributions under the null hypothesis. The white circles indicate the medians. The thick black bar indicates the interquartile range (IQR). The black whiskers indicate 1.5 times the IQR. B) Frequency difference plots of observed minus expected lamin fiber to NPC distances. The green portion below the line indicates where the observed frequency is less than expected. The purple portion above the line indicates where the observed frequency is greater than expected. C) NPC to lamin face center distances displayed as in (A), rotated 90 degrees counterclockwise. D) Frequency difference plot of NPC to lamin face center distances, displayed as in (C), rotated 90 degrees counterclockwise.

**Figure 3-Figure supplement 1.** Bivariate histograms of WT MEFs

**Figure 3-Figure supplement 2.** Bivariate histograms of *Lmnb1*<sup>-/-</sup> and *Lmna*<sup>-/-</sup> MEFs

**Figure 3-Figure supplement 3.** Violin plots comparing the number of NPCs detected in WT *Lmna*<sup>-/-</sup> and *Lmnb1*<sup>-/-</sup> MEFs



255 The average number of NPCs per nucleus in a single focal plane was reduced to 1000 NPCs in  
256 *Lmna*<sup>-/-</sup> MEFs compared to 1200 in *Lmnb1*<sup>-/-</sup> MEFs and 1500 in WT MEFs (Table 1, Figure 3 - Figure  
257 Supplement 3).

### 258 **Cryo-electron tomography (Cryo-ET) and immunogold labeling reveals lamin fila-** 259 **ments contacting the nucleoplasmic ring of NPCs**

260 In order to further investigate the relationship between lamin filaments and NPCs, we carried  
261 out cryo-ET of WT MEFs coupled with immunogold labeling of both LA and LB1. We hypothesized  
262 that this may shed additional insights on the lamin-NPC interaction and could reflect the relative  
263 abundance of LA and LB1 filaments contacting the NPC. We extracted 340 nm x 340 nm x 20 nm  
264 subtomograms around the nucleoplasmic ring of NPCs (Figure 4A; *Turgay et al. (2017)*) and counted  
265 the number of LA/C or LB1 filaments (Figure 4B). We observed more LA/C filaments than LB1 fila-  
266 ments in these regions (Figure 4C). These results also demonstrate that both LA and LB1 fibers are  
267 closely associated with the nucleoplasmic ring.

### 268 **Depletion of the nucleoporins ELYS or TPR modifies the spatial relationship of LA** 269 **fibers and NPCs in WT MEFs**

270 The cryo-ET observations, taken together with the demonstration that there was a proximal lat-  
271 eral association between NPCs and both LA and LB1 fibers suggested that there are attachments  
272 of lamin filaments to nucleoplasmic components of NPCs. We next explored the potential roles of  
273 individual nucleoporins in attaching lamin fibers to the NPCs. For these studies we focused on ELYS,  
274 NUP153 and TPR, all components of the nucleoplasmic NPC structures that are in close proximity  
275 to the lamina (*Roux et al., 2012*). The nucleoporin ELYS is a component of the nucleoplasmic ring  
276 of NPCs and is required for post-mitotic NPC assembly where it binds to the chromosomes and re-  
277 cruits the Nup107-160 complex of the nucleoplasmic ring (*Franz et al., 2007*). TPR and Nup153 are  
278 both components of the nuclear basket structure of the NPC that associates with the nucleoplasmic  
279 ring (*Duheron et al., 2014; Krull et al., 2004*). We employed siRNA knockdown of each nucleoporin  
280 to determine their potential roles in linking the NPC to lamin fibers (Figure 5- Figure Supplement  
281 1). We evaluated the efficacy of the knockdown by Western blot of whole cell lysates resulting in  
282 reductions of amount of each protein by 75%, 50%, or 40% for NUP153, ELYS, or TPR, respectively  
283 (Figure 5- Figure Supplement 2). Knockdown of either ELYS or TPR led to significant changes in  
284 NPC distribution and structural relationship to the LA fibers. The most dramatic effect was the re-  
285 organization of NPCs into clusters after ELYS knockdown (Figure 5A). Individual fluorescent puncta  
286 could still be resolved within each cluster indicating that some NPC structure was likely retained. In  
287 contrast, siRNA knockdown of NUP153 or TPR did not cause NPC clustering in WT MEFs (Figure 5A).  
288 The median distance between the centers of NPCs and LA fibers in ELYS depleted cells (70.8 nm;  
289 +20 nm vs scrambled;  $p < 0.001$ ; Table 2A, Figure 5A, B, Figure 5- Figure Supplement 1) increased  
290 compared to scrambled siRNA controls (50.9 nm;  $p < 0.001$ ; Table 2A, Figure 5A, B, Figure 5- Figure  
291 Supplement 1). Additionally, the median distance between face centers of the LA fiber meshwork  
292 and the NPCs was reduced (89.7 nm; Table 2B; Figure 5C) compared to scrambled siRNA (106.2 nm;  
293  $p < 0.001$ ; Table 2B, Figure 5C, Figure 5- Figure Supplement 1). These data suggested that LA fibers  
294 were being excluded from the ELYS depleted NPC clusters such that these clusters became located  
295 in large faces within the LA meshwork. Interestingly, the size of faces contained within the LA mesh-  
296 work also appeared to increase upon ELYS knockdown (Figure 5A). As a measure of lamin face size,  
297 we summed the NPC to fiber distances and the NPC to face center distances, since, for a perfectly  
298 circular face in the meshwork, this quantity would be the radius of the circle with respect to each  
299 NPC. The face radius of the LA fiber meshwork (169.7 nm; Table 2C) significantly increased versus  
300 the scrambled siRNA control (163.3 nm;  $p < 0.001$ ; Table 2C) upon ELYS knockdown indicating that  
301 the LA meshwork expanded when ELYS was depleted.

302 While there did not appear to be NPC clustering upon TPR depletion, the NPCs appeared to  
303 be less associated with the LA fibers and more centered within the faces of a dense LA meshwork

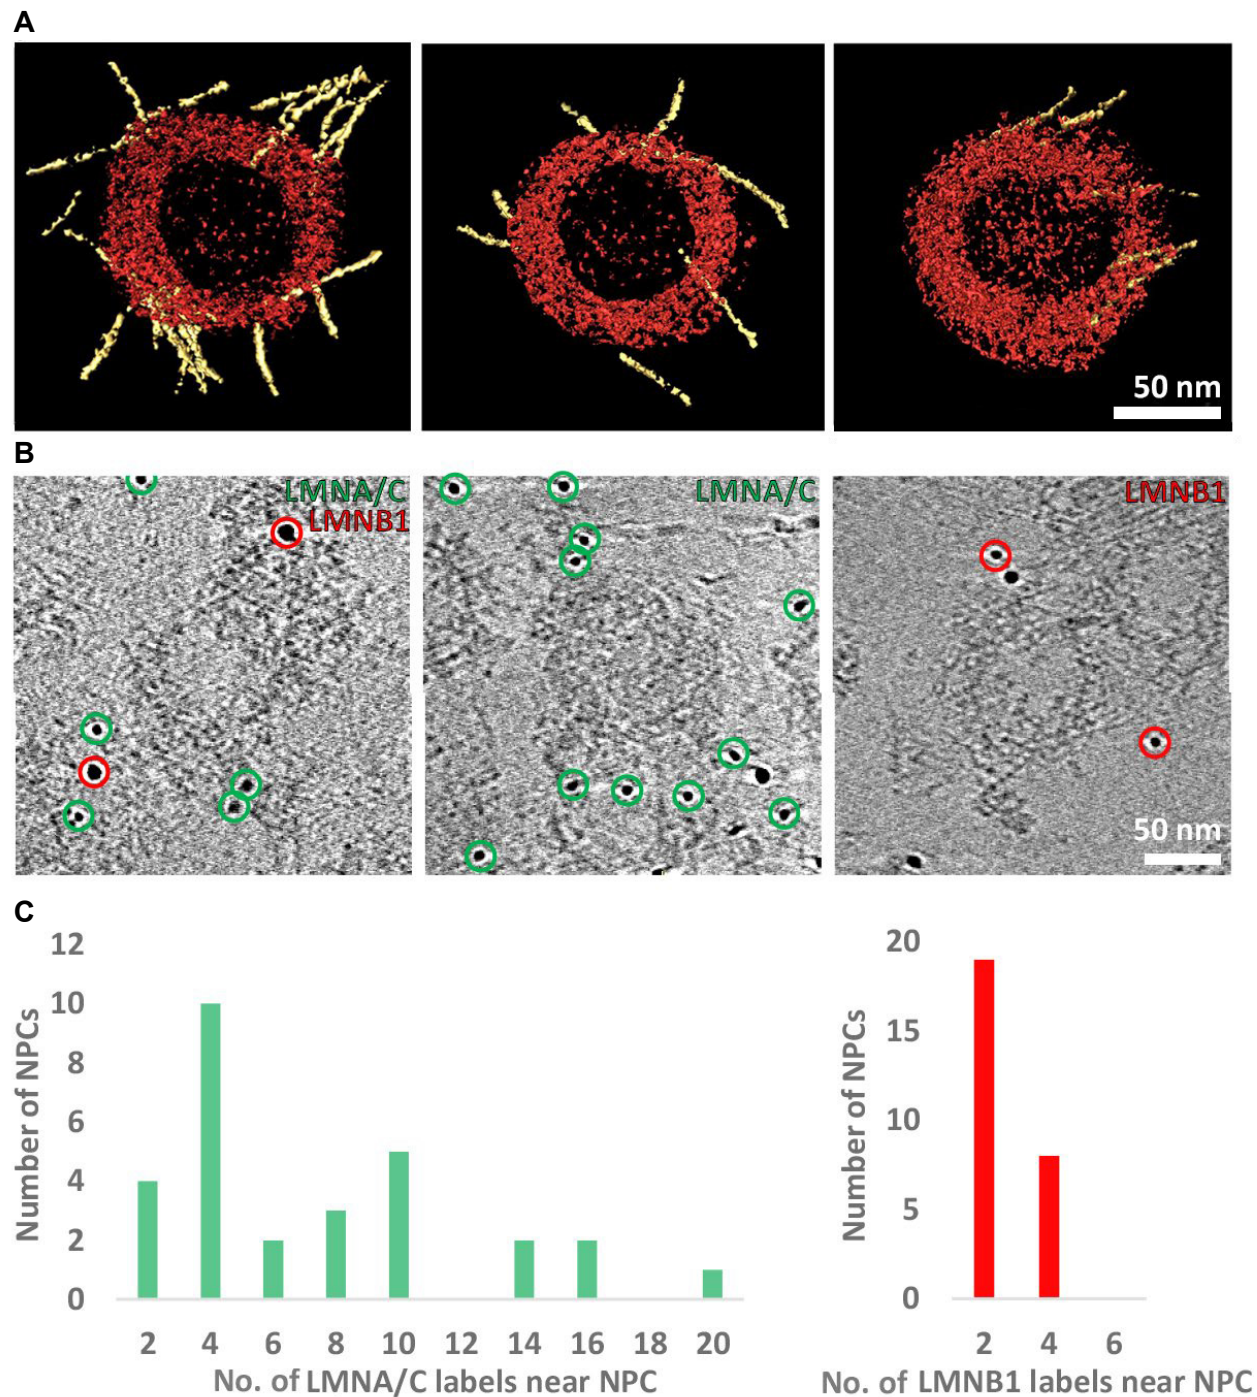

**Figure 4.** Cryo-Electron Tomography Showing LA/C and LB1 Filament Contacts with the Nucleoplasmic Ring Enrichment of LA/C over LB1 around the nucleoplasmic ring of NPCs. A) Lamin filaments (yellow) interact with NPCs (red) as seen by surface rendering representations of cryo-sub-tomograms. B) Gold labelling of lamin filaments observed by cryo-ET. The position of Lamin A/C labels (green) and Lamin B1 labels (red) are indicated. Double labeling (left) or labeling of individual lamin isoform were analyzed and presented as histograms. The unmarked gold particles (B-middle, right) are fiducial markers. C) A total number of 214 Lamin A/C labels and 70 Lamin B1 labels were detected around 47 nucleoplasmic rings.

304 (Figure 5A). The median distance between the centers of NPCs and LA fibers with TPR silencing  
305 (59.0 nm; Table 2A, Figure 5 B,C, Figure 5- Figure Supplement 1) increased versus a scrambled  
306 siRNA control, though to a lesser magnitude than for ELYS knockdown (+8.2 nm TPR KD vs +20.0  
307 nm ELYS KD;  $p < 0.001$ ; Table 2A, Figure 5 B,C). The median distance between NPCs and LA face  
308 centers (90.0 nm; Table 2B, Figure 5D) was reduced with TPR silencing (-16.2 nm;  $p < 0.001$ ; Table  
309 2B, Figure 5 D, E). The face radius of the LA fiber meshwork (154.3 nm;  $p < 0.001$ ; Table 2C) was  
310 decreased upon TPR depletion (-9.1 nm;  $p < 0.001$ ; Table 2C). These data suggested that the NPCs  
311 were less closely associated with LA fibers following TPR knockdown. Additionally, the reduced  
312 face size suggested that the LA meshwork faces were reduced in size (e.g., compacted) upon TPR  
313 knockdown forcing NPCs into more confined spaces than in WT LA meshworks.

314 In contrast to ELYS and TPR knockdowns, NUP153 knockdown only slightly reduced the median  
315 distance between NPCs and LA fibers (-0.8 nm;  $p < 0.001$ ; Table 2A, Figure 5B, C). This reduction  
316 was an order of magnitude smaller than observed for the knockdown of either ELYS or TPR. The  
317 distance between LA face centers and NPCs was reduced (-6.5 nm;  $p < 0.001$ ; Table 2B, Figure 5  
318 D, E, Figure 5- Figure Supplement 1) and the face radius for the LA meshwork was reduced (-7.5  
319 nm;  $p < 0.001$ ; Table 2C). The faces in the LA meshwork also appeared smaller and more compact  
320 compared to controls which was similar to the effect seen with TPR knockdown.

### 321 **Depletion of ELYS or TPR modifies the spatial relationship of LC fibers and NPCs**

322 Our analysis of LC fibers and NPCs suggested that LC fibers do not have a definable relationship  
323 with NPCs in WT MEFs (see Figure 3). However, the co-distribution of LC fibers and NPCs was signifi-  
324 cantly modified by knockdown of either ELYS or TPR. ELYS knockdown resulted in an increase in the  
325 median distance between NPCs and LC fibers (63.1 nm; +20.2 nm vs scrambled;  $p < 0.001$ ; Table  
326 2A, Figure 6 A,B,C, Figure 6- Figure Supplement 1) and the LC face center to NPC center distances  
327 decreased (96.1 nm; -13.0 nm vs scrambled;  $p < 0.001$ ; Table 2B, Figure 6 D,E). The knockdown of  
328 ELYS also increased the effective face radius (167.5 nm; +10.5 nm vs scrambled;  $p < 0.001$ ; Table  
329 2C) indicating that ELYS silencing results in expanded LC meshworks as it did for LA meshworks.  
330 These results suggest that the NPC clusters induced by ELYS depletion exclude LC fibers as well as  
331 LA fibers.

332 siRNA knockdown of TPR resulted in an increase in the median distance between NPCs and LC  
333 fibers (+13.7 nm vs scramble;  $p < 0.001$ ; Table 2A, Figure 6B, C, Figure 6- Figure Supplement 1), a  
334 decrease in median distances between NPCs and LC face centers (-19.2 nm;  $p < 0.001$ ; Table 2B,  
335 Figure 6 D,E) and a decrease in the effective face radius (-6.2 nm; Table 2C;  $p < 0.001$ ). These results  
336 indicate that the LC meshwork face size decreased after TPR knockdown, similar to LA.

337 NUP153 knockdown resulted in a decrease (-3.0 nm;  $p < 0.001$ ; Table 2A, Figure 6 B, C, Figure  
338 6- Figure Supplement 1) in the median distance between NPCs and LC fibers. Decreases in LC face  
339 to NPC center distances (-2.2 nm;  $p < 0.001$ ; Table 2B, Figure 6 D,E) and face radius were also  
340 detected (-4.1 nm;  $p < 0.001$ ; Table 2C). While these decreases are consistent with the change seen  
341 in the distances between NPCs and LA fibers, the magnitude of the change is much less than for  
342 depletion of ELYS or TPR. Overall, the observed changes in the NPC distribution relative to LC fibers  
343 upon ELYS, TPR, and NUP153 knockdown were similar to those observed for LA fibers.

### 344 **Depletion of TPR, NUP153, or ELYS changes the spatial relationship of LB1 fibers and NPCs**

345 Depletion of TPR, NUP153, or ELYS altered the median center-to-center distance between LB1  
346 fibers and NPCs (+0.5 nm, -4.7 nm, and -3.1 nm, respectively, Obs. - Scram;  $p < 0.001$ ; Table 2A,  
347 Figure 7A, B, Figure 7- Figure Supplement 1) relative to scrambled siRNA controls. The small mag-  
348 nitude of these changes suggests that depletion of these nucleoporins had a minimal impact on  
349 the relationship between LB1 and NPCs compared to the changes seen in the distances between  
350 NPCs and LA/C fibers (Figure 7C). In contrast, the changes in median distance between LB1 face  
351 centers and NPCs were larger in magnitude upon knockdown of TPR, NUP153, or ELYS (-19.2 nm,  
352

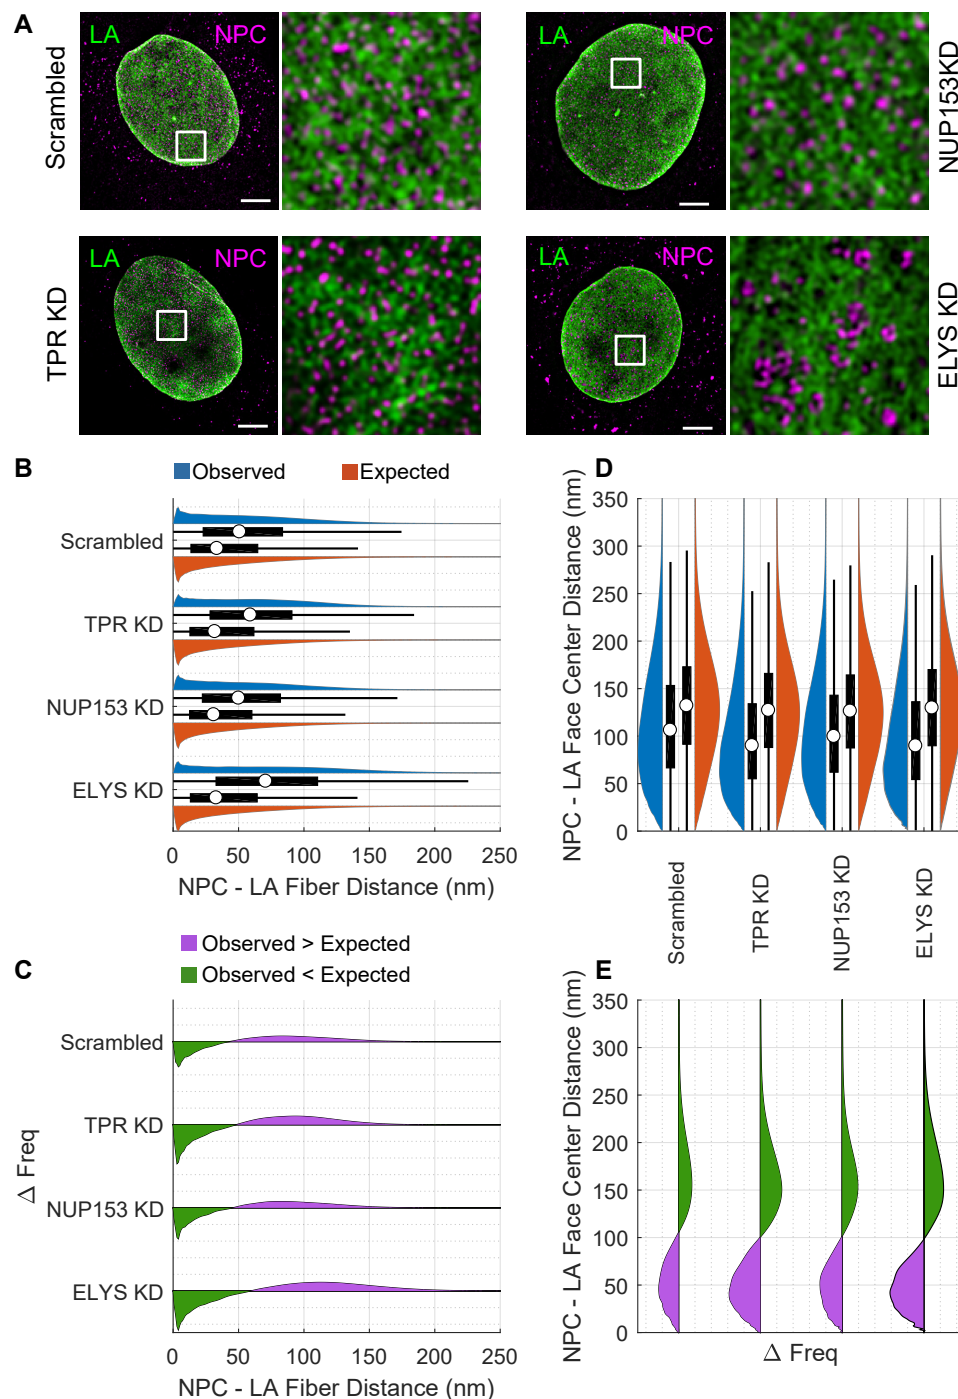

**Figure 5.** Co-distribution of LA and NPC components after siRNA Transfection. A) Immunofluorescence images of LA (green) and NPCs (magenta) following knockdowns (KD) of TPR, NUP153, ELYS and scramble control. Note the clustering of NPCs in the ELYS KD. Scale bar = 5  $\mu$ m. B) Paired violin and box plots of NPC center to LA fiber center distances. The violin (blue) and box plots represent the observed distance distributions. The violin (red) and box plots on bottom represent the expected distance distributions under the null hypothesis. The white circle indicates the median. The thick black bar indicates the interquartile range (IQR). The black whiskers indicate 1.5 times the IQR. C) Frequency difference plots of observed minus expected LA fiber to NPC distances for the silencing series. The green portion below the line indicates where the observed frequency is less than expected. The purple portion above the line indicates where the observed frequency is greater than expected. D) NPC center to LA face center distances displayed as in (B), rotated 90 degrees counterclockwise. E) Frequency difference plot of NPC to LA face center distances, displayed as in (C), rotated 90 degrees counterclockwise.

**Figure 5-Figure supplement 1.** Bivariate histograms of LA Fiber-NPC and Face Center-NPC Distances

**Figure 5-Figure supplement 2.** Western Blots of ELYS, NUP153, AND TPR siRNA Knockdown Experiments

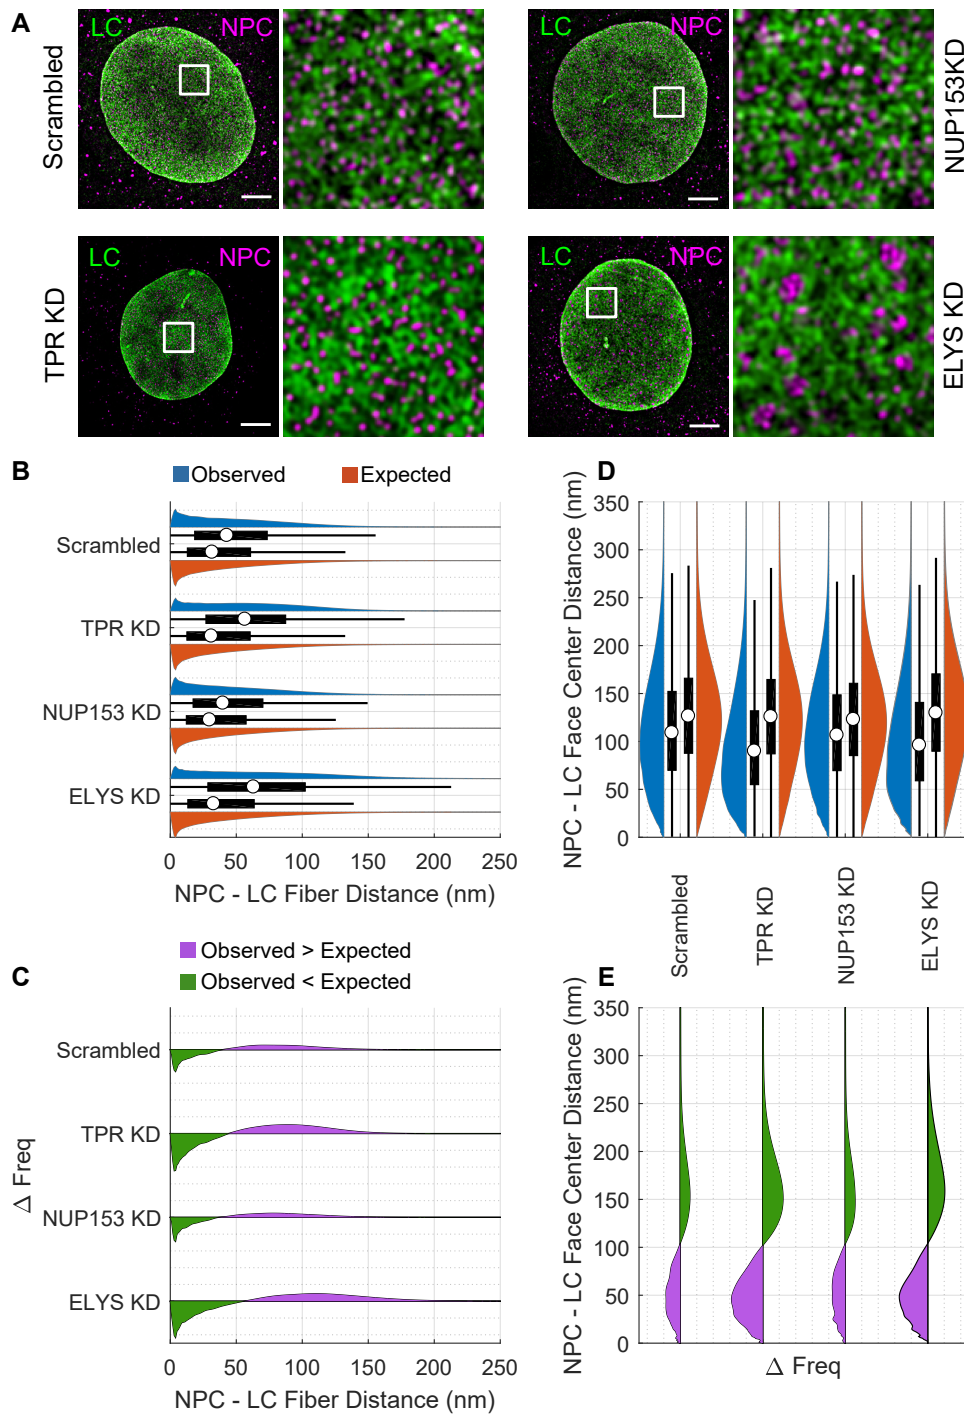

**Figure 6.** Co-distribution of LC and NPCs after siRNA Transfection. A) Double label immunofluorescence images of LC (green) and NPCs (magenta) following KDs of TPR, NUP153, ELYS and scramble control. Scale bar = 5  $\mu$ m. B. Paired violin and box plots of NPC center to LC fiber center distances. The violin (blue) and box plots on top represent the observed distance distributions. The violin (red) and box plots on bottom represent the expected distance distributions under the null hypothesis. The white circle indicates the median. The thick black bar indicates the interquartile range (IQR). The black whiskers indicate 1.5 times the IQR. C) Frequency difference plots of observed minus expected LC fiber to NPC distances for the silencing series. The green portion below the line indicates where the observed frequency is less than expected. The purple portion above the line indicates where the observed frequency is greater than expected. D) NPC center to LC face center distances displayed as in (B), rotated 90 degrees counterclockwise. E) Frequency difference plot of NPC center to LC face center distances, displayed as in (C), rotated 90 degrees counterclockwise.

**Figure 6-Figure supplement 1.** Bivariate histograms of LC Fiber-NPC and Face Center-NPC Distances

353 -2.5 nm, and -13.0 nm, respectively; Obs. – Scram.;  $p < 0.001$ ; Table 2B, Figure 7 D, E, Figure 7-  
354 Figure Supplement 1); and face radii decreased (-20.3 nm, -1.1 nm, -17.6 nm; Obs. – Scram.;  $p <$   
355 0.001; Table 2C). Knocking down TPR or ELYS decreased the distances between NPCs and LB1 face  
356 centers as well as the LB1 face radii, while knocking down NUP153 had less impact.

### 357 **Depletion of ELYS, TPR, or Nup153 has a minor impact on the independence be-** 358 **tween LB2 fibers and NPCs**

359 As described in previous sections, we could not detect a relationship between LB2 fibers and  
360 NPCs in WT MEFs (see Figure 3). Upon knockdown of TPR, NUP153, or ELYS, the observed distances  
361 between LB2 fibers and NPCs differed by a few nanometers from expected (-1.7 nm, -6.6 nm, and  
362 +3.0 nm, respectively; Obs.- Exp.,  $p < 0.01$ ; Table 2A, Figure 8A,B, Figure 8- Figure Supplement 1)  
363 and from the scramble control (-1.5 nm, -4.4 nm, and +4.1 nm, respectively; Obs. - Scram;  $p <$   
364 0.01; Table 2A, Figure 8A,B,C). Although the changes in association between the NPCs and LB2  
365 fibers were minimal, the differences were statistically significant with NUP153 knockdown having  
366 the greatest effect. In contrast, LB2 face center to NPC center distances (-13.6 nm, +0.9 nm, and  
367 -18.2 nm vs scrambled; Obs. – Scram.;  $p < 0.01$ ; Table 2B; Figure 8D,E) and the face radii decreased  
368 significantly (-16.4 nm, -4.9 nm, -14.8 nm vs scrambled; Obs. – Scram;  $p < 0.01$ ; Table 2C, , Figure 8-  
369 Figure Supplement 1), following knockdown of TPR, NUP153, or ELYS, respectively. Thus, the main  
370 effect of the TPR and ELYS knockdown was to decrease the LB2 face radii and the distance to the  
371 LB2 face centers relative to the NPC distribution. In contrast, the LB2 fiber to NPC center distances  
372 were not perturbed to the same extent when compared to the other lamin fibers.

### 373 **NPC changes in *Lmna*<sup>-/-</sup> and *Lmnb1*<sup>-/-</sup> MEFs after nucleoporin knockdown**

374 In addition to the NPC clustering following ELYS knockdown in WT MEFs (Figure 5A), we ob-  
375 served similar NPC clustering following ELYS knockdown in *Lmna*<sup>-/-</sup> and *Lmnb1*<sup>-/-</sup> MEFs (Figure 8 -  
376 Figure Supplement 2A). This suggest the clustering effect induced by ELYS depletion is not strongly  
377 dependent on the presence of LA/C or LB1.

378 NUP153 knockdown had modest effects on the relationship of NPC to lamin fiber distances  
379 and lamin meshwork sizes in WT cells. However, we did observe clustering of NPCs in *Lmna*<sup>-/-</sup> and  
380 *Lmnb1*<sup>-/-</sup> upon silencing of NUP153 (Figure 8 - Figure Supplement 2B).

381 With TPR knockdown we did not see an increase in the number of NPCs or clustering compared  
382 to scrambled siRNA in WT MEFs (Figure 8 - Figure Supplement 2C,D). The only change in the num-  
383 ber of NPCs in WT MEFs was upon ELYS KD, but this may be due to our inability to resolve individual  
384 NPCs in the the clusters that formed ( $p < 0.01$ ). However, the shape of the distribution of the num-  
385 ber of NPCs following TPR knockdown was altered in *Lmnb1*<sup>-/-</sup> MEFs due to an increased proportion  
386 of cells showing a similar number of NPCs as WT MEFs, suggesting that effects on the number of  
387 pores following TPR KD may be dependent on the amount of LB1 present in the cell (Figure 8 - Fig-  
388 ure Supplement 2D). However, across the ten cells analyzed, the change in the median number of  
389 NPCs observed in *Lmnb1*<sup>-/-</sup> MEFs was not significant changed upon TPR KD versus scramble control  
390 (Figure 8 - Figure Supplement 2D).

## 391 **Discussion**

392 Lamins and nucleoporins assemble into the nuclear lamina and NPCs within the nuclear enve-  
393 lope and have unique functions critical for cellular function including gene expression and genome  
394 maintenance, mechanotransduction, mitosis and a host of other activities. However, the structural  
395 and functional interactions between the NL and NPCs are relatively understudied and the potential  
396 cooperativity between these structures is largely unknown. In this study, we have focused on the  
397 structural association between the NL and NPCs.

398 Our 3D-SIM imaging and image analysis of MEFs has revealed important insights into the struc-  
399 tural relationship between the lamin fibers and NPCs. Removing either LA/C or LB1 from the NL

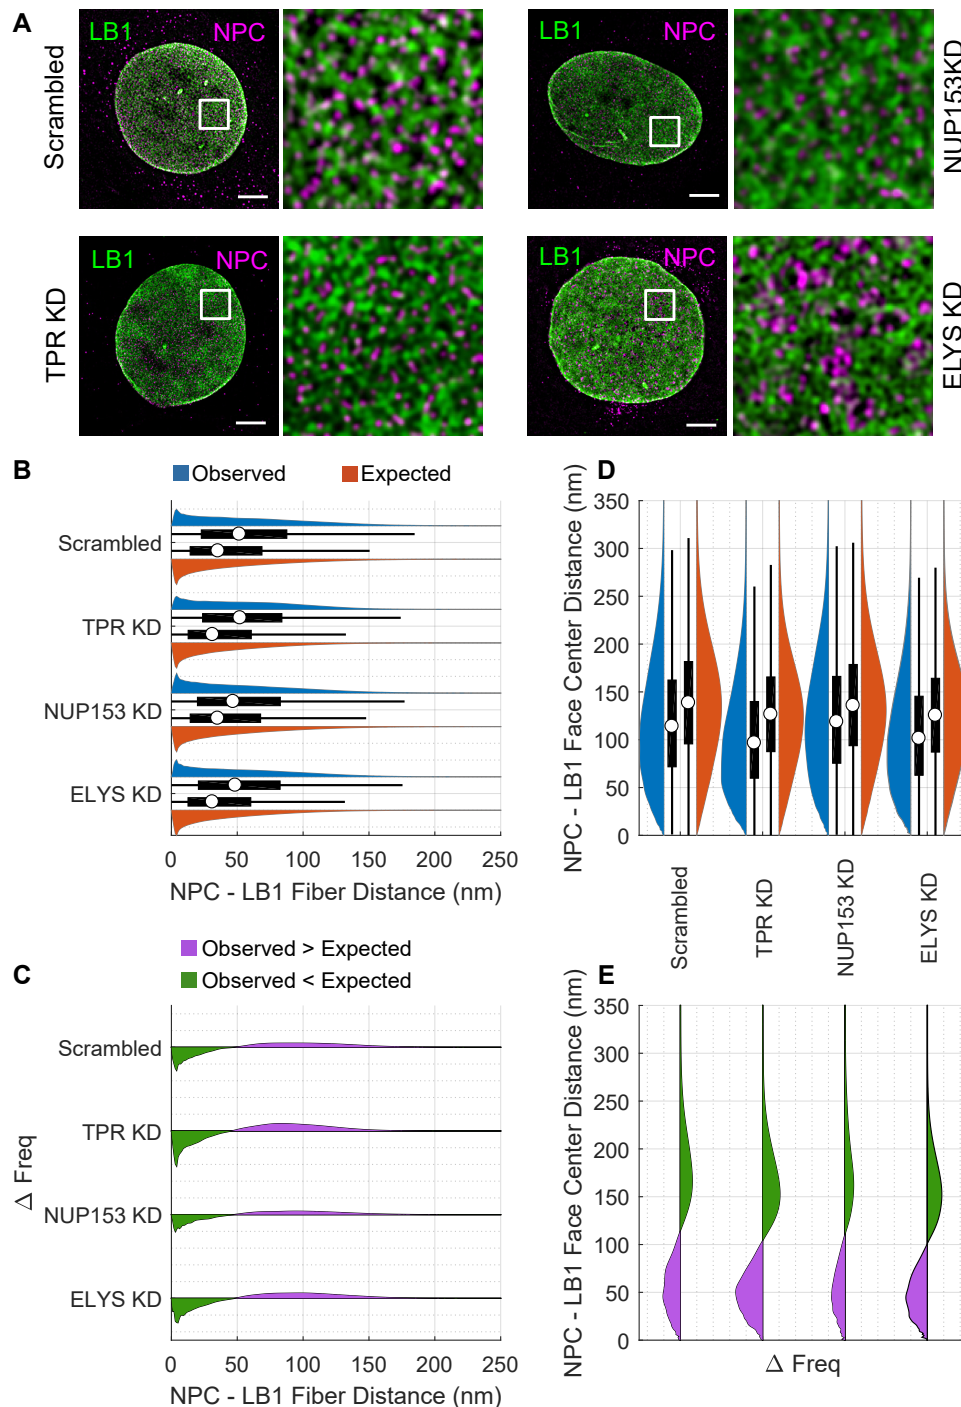

**Figure 7.** Co-distribution of LB1 and NPCs after siRNA Transfection. A) Double label immunofluorescence images of LB1 (green) and NPCs (magenta) following KDs of TPR, NUP153, ELYS and scramble control. Scale bar = 5  $\mu$ m. B) Paired violin and box plots of NPC center to LB1 fiber center distances. The violin (blue) and box plots on top represent the observed distance distributions. The violin (red) and box plots on bottom represent the expected distance distributions under the null hypothesis. The white circle indicates the median. The thick black bar indicates the interquartile range (IQR). The black whiskers indicate 1.5 times the IQR. C) Frequency difference plot of observed minus expected LB1 fiber to NPC center distances for the silencing series. The green portion below the line indicates where the observed frequency is less than expected. The purple portion above the line indicates where the observed frequency is greater than expected. D) NPC center to LB1 face center distances displayed as in (B), rotated 90 degrees counterclockwise. E) Frequency difference plot of NPC to LB1 face center distances, displayed as in (C), rotated 90 degrees counterclockwise.

**Figure 7-Figure supplement 1.** Bivariate histograms of LB1 Fiber-NPC and Face Center-NPC Distances

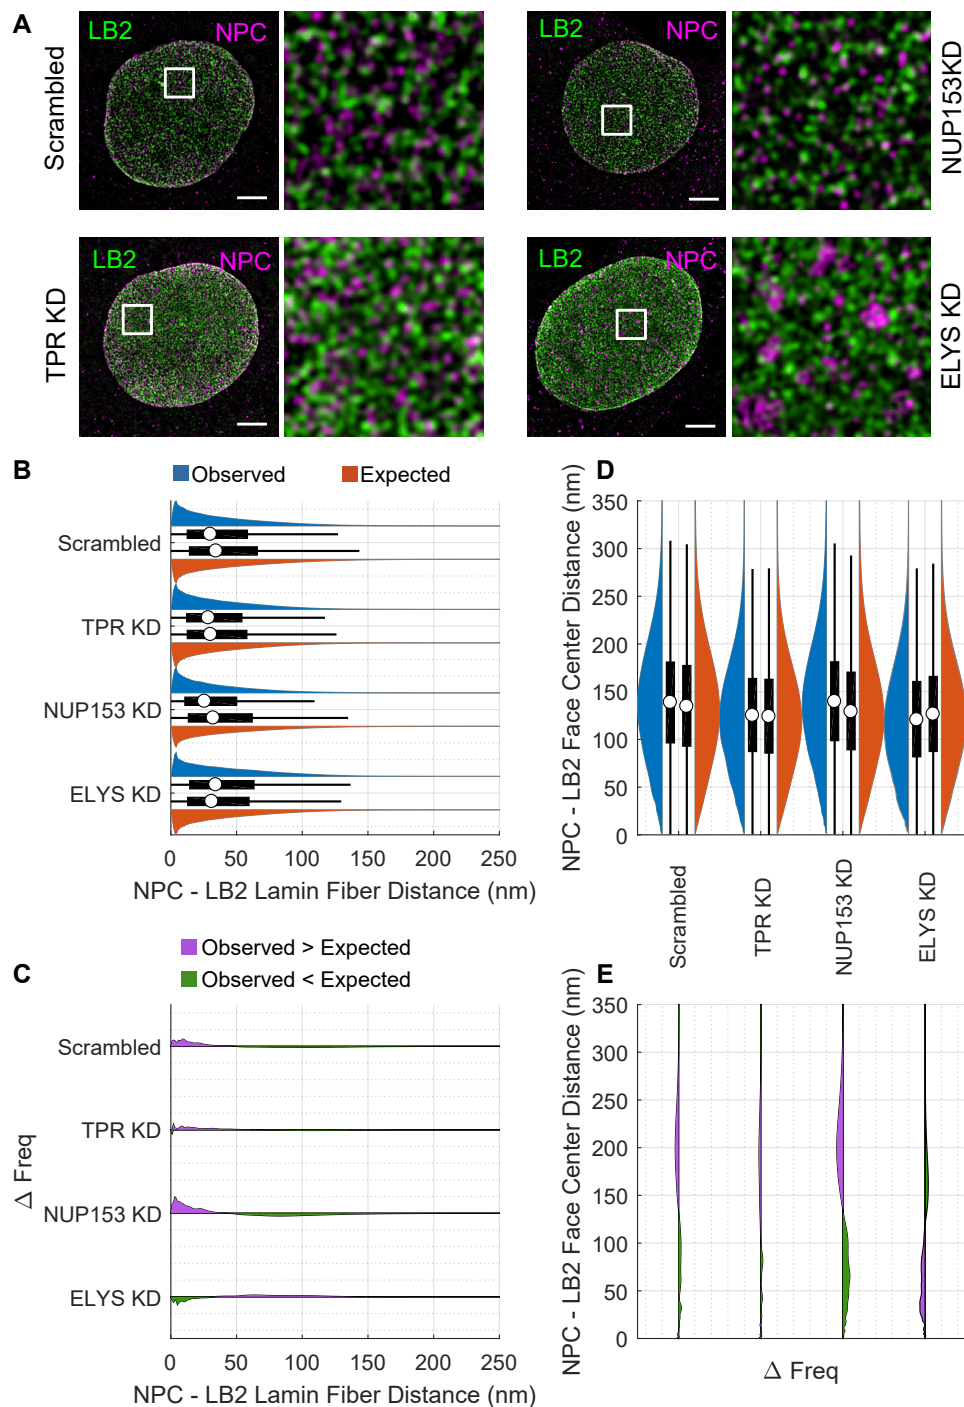

**Figure 8.** Co-distribution of LB2 and NPCs after Silencing Nucleoporins A) Immunofluorescence images of LB2 (green) and NPCs (magenta) following KDs of TPR, NUP153, ELYS and scramble control. Scale bar = 5  $\mu$ m. B) Paired violin and box plots of NPC center to LB2 fiber center distances. The violin (blue) and box plots on top represent the observed distance distributions. The violin (red) and box plots on bottom represent the expected distance distributions under the null hypothesis. The white circle indicates the median. The thick black bar indicates the interquartile range (IQR). The black whiskers indicate 1.5 times the IQR. C) Frequency difference plot of observed minus expected LB2 fiber center to NPC center distances. The green portion below the line indicates where the observed frequency is less than expected. The purple portion above the line indicates where the observed frequency is greater than expected. D) NPC center to LB2 face center distances displayed as in (B), rotated 90 degrees counterclockwise. E) Frequency difference plot of NPC to LB2 face center distances, displayed as in (C), rotated 90 degrees counterclockwise.

**Figure 8-Figure supplement 1.** Bivariate histograms of LB2 Fiber-NPC and Face Center-NPC Distances

**Figure 8-Figure supplement 2.** Effect of ELYS, NUP153, and TPR KD in *Lmnb1*<sup>-/-</sup> and *Lmna*<sup>-/-</sup> MEFs



400 by gene knockout causes the enlargement of meshwork faces (*Shimi et al., 2015*) accompanied  
401 by the NPC localization to the perimeter of lamin meshwork faces and the decrease in NPC den-  
402 sity (Figure 1B and 1C), indicating that LA/C and LB1 are required for maintaining the normal NPC  
403 distribution/density. These results have led to the idea that nascent NPCs are formed in close prox-  
404 imity to lamin fibers and/or existing NPCs are stably anchored to lamin fibers. To support this idea,  
405 we have observed by cryo-ET that lamin filaments appear to have a direct contact with the outer  
406 ring or basket of NPCs (Figure 4) as supported by biochemical evidence suggesting that the lamin  
407 filament-NPC association is relatively strong (*Kay et al., 1972; Dwyer and Blobel, 1976; Scheer et al.,*  
408 *1976*). It is possible that LA/C or LB1 KO reduces the mass of lamin filaments/fibers to provide less  
409 anchorage sites for NPCs.

410 Based on our results, specific nucleoporins are involved in maintaining the normal lamin mesh  
411 hole size and NPC distribution/density. ELYS is a component of the Nup107-160 complex located  
412 at the outer ring of the NPC (*Rasala et al., 2006*) and is in close proximity to LA in the NL (*Roux*  
413 *et al., 2012*). ELYS KD induces the formation of NPC clusters within enlarged LA/C meshwork faces,  
414 leading to the disruption of the normal lamin fiber-NPC association (Figure 5-8). It is too difficult  
415 to check the ELYS KD effect on NPC density because single NPCs within each cluster cannot be  
416 resolved by 3D-SIM (Figure 5-8). These results strongly suggest the lamin association with ELYS  
417 mediates the structural relationship between the lamin filaments/fibers and NPCs. In mammalian  
418 cells, the NL and NPCs disassemble at the nuclear envelope break down (NEBD) and reassemble  
419 during cell division. The disassembly and reassembly of the NL and NPCs are considered to be  
420 coupled to the phosphorylation and dephosphorylation of lamins, nuclear membrane proteins  
421 and nucleoporins (*Gerace and Blobel, 1980; Peter et al., 1990; Dessev et al., 1991; Foisner and*  
422 *Gerace, 1993; Macaulay et al., 1995; Favreau et al., 1996*). ELYS is accumulated on the surface  
423 of the chromosome mass at the early stage of the NE reassembly to recruit other nucleoporins,  
424 nuclear membrane proteins and lamins to the NE (*Rasala et al., 2006*). Because ELYS KD causes  
425 defects in reassembling nucleoporins and nuclear membrane proteins to the NE (*Rasala et al.,*  
426 *2006; Doucet et al., 2010*), NPC clusters and enlarged meshwork faces might be formed during the  
427 NE reassembly. In its absence other molecules such as the other lamin isoforms may be separating  
428 NPCs from LA fibers.

429 We show that the effects of TPR KD are almost opposite from those of ELYS KD, decreasing  
430 lamin mesh hole size (Figure 5-8). It has been reported that NPC density is increased by TPR KD  
431 because TPR provides a scaffold for ERK1/2 to phosphorylate Nup153 in the nuclear basket of  
432 NPCs, which is critical for early stages of NPC biogenesis (*McCloskey et al., 2018*). TPR KD reduces  
433 the phosphorylation of Nup153 to slow NPC biogenesis down, causing the accumulation of NPCs.  
434 On the other hand, a mechanism for tightening lamin meshworks by TPR KD is totally unknown.  
435 Though we do not detect an increase in lamin expression by western blotting, the mass of lamin  
436 filaments/fibers might be locally changed by the unknown mechanism (data not shown). Mitotic  
437 phosphorylation sites of lamins are phosphorylated during interphase and involved in regulating  
438 the exchange of lamins between the NL and nucleoplasm (*Kochin et al., 2014*). It is possible that  
439 TPR contributes to phosphorylate adjacent lamins through the ERK-MAPK pathway to control lamin  
440 exchange proximal to NPCs. TPR KD might cause the accumulation of lamin filaments/fibers, con-  
441 sequently providing more anchorage sites for NPCs.

442 The functional aspect of the structural association between the NL and NPCs that we describe  
443 in this study still remain unclear. Electron microscopic studies have revealed that the NL asso-  
444 ciates with heterochromatin while NPCs associate with euchromatin (*Fawcett, 1966; Ou et al.,*  
445 *2017*). Moreover, genomic studies indicate that lamina-associated domains (LADs) are silenced for  
446 transcription while nucleoporin-associated regions (NARs) are transcriptionally permissive (*Gue-*  
447 *len et al., 2008; Toda et al., 2017*). The contacting surfaces of the lamin filaments/fibers with NPCs  
448 should correspond to the boundaries between these different chromatin structures, which implies  
449 that the boundaries facilitate distinct functions of these chromatin structures.

450 Over 500 mutations in the LMNA gene cause human diseases, collectively termed laminopathies.

451 LA/C KO mice exhibit disease phenotypes including muscular dystrophy, cardiomyopathy and pe-  
452 ripheral neuropathy before death at 6-8 weeks, partially mimicking a subpopulation of human  
453 laminopathies (*Sullivan et al., 1999; Kim and Zheng, 2013*). As fibroblasts from patients carrying a  
454 LMNA mutation (G608G) causing Hutchinson-Gilford progeria syndrome (HGPS) exhibit distortion  
455 of the NL structure, misshaping of their nuclei and redistribution of NPCs (*Goldman et al., 2004*).  
456 LB1 KO causes perinatal lethality in mice attributable to developmental defects in the forebrain,  
457 bone and lung (*Vergnes et al., 2004; Kim et al., 2011*); whereas the LB2 KO involves less severe  
458 defects in forebrain development compared to the LB1 KO mice (*Kim et al., 2011*). The majority of  
459 the underlining mechanisms in which these lamin-deficiencies cause laminopathies and other de-  
460 fects has yet to be determined. Our findings may shed new light on physiological and pathological  
461 significance of the reciprocal relationship between the lamin filaments/fibers and NPCs

## 462 **Materials and Methods**

### 463 **Cell culture**

464 Immortalized WT, *Lmna*<sup>-/-</sup>, *Lmn1*<sup>-/-</sup>, and *Lmnb2*<sup>-/-</sup> MEFs were cultured as previously described  
465 (*Shimi et al., 2015*). Briefly, cells were cultured in modified DMEM (Thermo Fisher Scientific, Waltham,  
466 MA, USA) supplemented with 10% fetal calf serum, 50 U/ml penicillin G, 50 µg/ml streptomycin sul-  
467 fate (Thermo Fisher Scientific) at 37°C in a humidified CO2 incubator.

### 468 **Super resolution microscopy**

469 3D-SIM was carried out as previously described (*Shimi et al., 2015*). Briefly, a Nikon Structured  
470 Illumination Super-resolution Microscope System (Nikon N-SIM; Nikon, Tokyo, Japan) was built on  
471 an ECLIPSE Ti-E (Nikon) equipped with sCMOS camera ORCA-Flash 4.0 (Hamamatsu Photonics Co.,  
472 Hamamatsu, Japan) and an oil immersion objective lens CFI SR (Apochromat TIRF 100×, NA=1.49,  
473 Oil, WD=0.12; Nikon). N-SIM was operated with NIS-Elements AR (Nikon). For image acquisition,  
474 21 optical sections including a region of the lamina were taken at 50-nm intervals. For image re-  
475 construction from the raw data, illumination modulation contrast, high-resolution noise suppres-  
476 sion, and out-of-focus blur suppression were set with fixed values of 1, 0.75, and 0.25, respectively.  
477 For presentation, images were adjusted for brightness and contrast. Statistical values were deter-  
478 mined using Student's t test.

### 479 **Indirect immunofluorescence**

480 Samples for indirect immunofluorescence were processed as previously described (*Shimi et al.,*  
481 *2015*). Cells were seeded on Gold Seal coverglasses (22 × 22 mm<sup>2</sup>, no. 1.5; Thermo Fisher Scientific)  
482 and fixed with methanol for 10 min at -20°C. Lamins were stained with rabbit polyclonal anti-LA  
483 (1:500; 323; *Dechat et al. (2007)*), goat polyclonal anti-LB1 (1:500; SC-6217; Santa Cruz Biotechnol-  
484 ogy, Dallas, TX, USA), and rabbit monoclonal LB2 (1:100; EPR9701(B); Abcam, Cambridge, MA, USA),  
485 and rabbit polyclonal anti-LC (1:500; 321; *Dechat et al. (2007)*). Nucleoporins were stained with  
486 mouse monoclonal MAb414 (1:1000; BioLegend, San Diego, CA). The secondary antibodies used  
487 were donkey anti-mouse immunoglobulin G (IgG)-Alexa Fluor 488, donkey anti-mouse IgG-Alexa  
488 Fluor 568, donkey anti-rabbit IgG-Alexa Fluor 488, donkey anti-rabbit IgG-Alexa Fluor 568, donkey  
489 anti-goat IgG-Alexa Fluor 488, and donkey anti-goat IgG-Alexa Fluor 568 (all 1:500; Thermo Fisher  
490 Scientific). Processed coverslips were mounted with ProLong Diamond antifade reagent (Thermo  
491 Fisher Scientific).

### 492 **RNA interference**

493 ON-TARGETplus siRNA oligos (Dharmacon, Lafayette, CO, USA) were used for RNAi-mediated  
494 knockdown experiments.

495 Scrambled sequence for control siRNAs;

496 1. (D-001810-01) 5'-UGGUUUACAUGUCGACUAA-3'

| Target         | Antibody   | Catalog #                   | Supplier    | Host Species | Dilution |
|----------------|------------|-----------------------------|-------------|--------------|----------|
| LA             | 323        | <i>Dechat et al. (2007)</i> | Goldman Lab | Rabbit       | 1/500    |
| LC             | 321        | <i>Dechat et al. (2007)</i> | Goldman Lab | Rabbit       | 1/500    |
| LB1            | M20        | sc-6217                     | Santa Cruz  | Goat         | 1/500    |
| LB2            | EPR9701(B) | ab151735                    | Abcam       | Rabbit       | 1/100    |
| FXFG Rep. Nups | mAb414     | 902902                      | Biolegend   | Mouse        | 1/1000   |

Primary Antibodies used for Immunofluorescence

- 497 2. (D-001810-02) 5'-UGGUUUACAUGUUGUGUGA-3'  
498 3. (D-001810-03) 5'-UGGUUUACAUGUUUUCUGA-3'  
499 4. (D-001810-04) 5'-UGGUUUACAUGUUUUCUA-3'

500 Nup153 siRNAs;

- 501 1. (J-057025-11) 5'-CGCUAUGUGCAUUGAUAAA-3'  
502 2. (J-057025-12) 5'-GGGACAGGCUUUGGAGAU-3'

503 ELYS siRNA

- 504 1. (J-051465-09) 5'-CCACUGAACUAACUACUAA-3'  
505 2. (J-051465-10) 5'-GGAAAGAAGAAGGACGUUA-3'

506 TPR siRNA;

- 507 1. (J-041152-09) 5'-CAACAAACAUUCAUCGGUA-3'  
508 2. (J-041152-10) 5'-CGUGACAUGUACCGAAUUU-3'

509  $5 \times 10^4$  MEFs were plated into each well of 6-well plates 24 h before transfection. 30 pmol of  
510 siRNA oligos was transfected onto the cells in each well with Lipofectamine RNAiMAX transfection  
511 reagents (Thermo Fisher Scientific), following the manufacturer's instructions. 48h after incubation  
512 at 37°C, the transfected cells were trypsinized and replated at  $5 \times 10^4$  cells/well into each well of 6-  
513 well plates and transfected with 30 pmol of the siRNA. 48h after incubated at 37°C, the transfected  
514 cells were trypsinized and replated on coverslips for indirect immunofluorescence or plated into a  
515 60 mm dish for western blotting.

### 516 **Quantitative blotting of anti-nucleoporin antibodies.**

517 The linearity of antibodies to nucleoporins was determined by immunoblotting of whole cell  
518 lysates of WT MEFs. Five samples of MEF lysates containing between  $7.5 \times 10^3$  to  $9 \times 10^3$  cells were  
519 separated in duplicate lanes of a 7.5% SDS-polyacrylamide gel (SDS-PAGE) and transferred to nitro-  
520 cellulose for immunoblotting. After transfer, the membrane was briefly rinsed in dH<sub>2</sub>O and stained  
521 with Revert Protein Stain (LI-COR) and imaged in an Odyssey Fc (LI-COR Biosciences, Lincoln NB)  
522 at 700nm. The membrane was then washed with TBS and blocked in 5% non-fat dry milk (NFM)  
523 in TBS for 1hr at room temperature and then in the same solution containing 0.1% Tween 20 for  
524 30 minutes. For incubation with antibodies, the appropriate antibody was diluted in blocking so-  
525 lution with Tween at the indicated dilution (See Table Below) and incubated overnight at 4 °C with  
526 gentle agitation. The blots were washed 3X 5 mins each wash with TBS containing 0.1% Tween 20.  
527 For detection, the appropriate secondary antibodies (Licor IRDye 800CW) were diluted 1:15000 in  
528 5% NFM containing 0.2% Tween 20 and incubated with the membrane for 1hr at room tempera-  
529 ture with gentle agitation. The membranes were washed 3X 5 mins each with TBS containing 0.1%  
530 Tween 20 and allowed to dry. The dried membranes were imaged in an Odyssey Fc at 800nm.

531 Images of the total protein stain and specific antibody labeling were analyzed using Empiria  
532 Studio Software (LI-COR Biosciences, Lincoln NB). The intensity of the specific antibody labeling  
533 in each lane was corrected for protein load using the software and the linearity of the antibody  
534 response was determined by the software.

| Target | Antibody | Catalog # | Supplier   | Host Species | Concentration             |
|--------|----------|-----------|------------|--------------|---------------------------|
| Nup153 | R3G1     | sc-101544 | Santa Cruz | Rat          | 200 $\mu\text{g mL}^{-1}$ |
| Elys   | bs-9880R | bs-9880R  | Bioss      | Rabbit       | 50 $\mu\text{g mL}^{-1}$  |
| Tpr    | ab84516  | ab84516   | Abcam      | Rabbit       | 100 $\mu\text{g mL}^{-1}$ |

Antibodies used for Western blotting

535 The degree of knockdown for each nucleoporin was determined by SDS-PAGE by loading dupli-  
536 cate samples of each knockdown cell lysate such that the antibody response should be in a linear  
537 range, based on the analysis of wt lysates. For quantitation of knockdown, a dilution series of wt  
538 lysate was run on the same gel at concentrations that were expected to be in the linear range  
539 of the antibody response. After electrophoresis and transfer, the membranes were treated identi-  
540 cally to the conditions for determining antibody linearity, imaged in the Odyssey Fc and the images  
541 analyzed using Empiria software.

#### 542 NPC-lamin rendered view

543 Cryo-electron tomograms that were acquired previously (*Turgay et al., 2017*) were further an-  
544 alyzed. The central coordinates of NPCs within cryo-tomograms of NE were determined manually  
545 and sub-tomograms (340 nm x 340 nm x 20 nm) were reconstructed in MATLAB, using the TOM  
546 toolbox (*Nickell et al., 2005*). The lamin filaments and NPCs in 4 selected sub-volumes were seg-  
547 mented manually and rendered, using the Amira software package (Thermo Fisher Scientific).

#### 548 Immunogold labelling image processing

549 Sub-tomograms of gold labeled lamins (*Turgay et al., 2017*) were reconstructed as described  
550 above (47 sub-tomograms). The subvolumes containing NPCs (in top-view orientation), were pro-  
551 jected along the Z axis, to produce a 2D image. The coordinates of the gold clusters (6 nm and  
552 10 nm) were identified manually and counted. The respective histograms were drawn in Excel  
553 (Microsoft).

#### 554 Computational Image Analysis

555 Computational image analysis was done using MATLAB (Mathworks, Natick, MA) using custom  
556 software developed in the Jaqaman Lab. Nikon ND2 files containing image and meta data were  
557 loaded into MATLAB using Bioformats (Open Microscopy Environment, *Linkert et al. (2010)*). Nu-  
558 clear pore complexes were detected and localized using an adapted pointSourceDetector routine  
559 from the lab of Gaudenz Danuser which involved two-dimensional local maxima detection, Gaus-  
560 sian fitting, and Gaussian mixture modeling. Lamin fibers were segmented using multi-orientation  
561 analysis as described in *Kittisopikul et al. (2019)* to accurately segment a meshwork structure with  
562 many junctions. Lamin fibers were further localized as in Appendix 1. The source is available on  
563 Github at <https://github.com/mkitti/LaminNpcAnalysis>

564 Computation was conducted on Northwestern University's high performance computing en-  
565 vironment, Quest. Files were stored on Northwestern University Research Data Storage Service  
566 FSMRESFILES. Globus.org and Box.com were used to transfer files between storage and computa-  
567 tional environments.

#### 568 Acknowledgments

569 The authors would like to acknowledge the assistance of the Center for Advanced Microscopy  
570 and the Nikon Imaging Center at the Feinberg School of Medicine, Northwestern University, for  
571 assistance with imaging and the use of the Nikon N-SIM Microscope.

## 572 Additional Information

### 573 Funding

574 The Nikon N-SIM used in this study was purchased through the support of NIH 1S10OD016342-  
575 01. The authors acknowledge the National Cancer Institute (T32CA080621 for M.K.), Japan Society  
576 for Promoting Science (JSPS, grant 18H06045 for T.S.), Swiss National Science Foundation Grant  
577 (SNSF 31003A\_179418 to O.M), and the National Institute of General Medical Sciences (R35GM119619  
578 to K.J; R01GM106023 to Y.Z. and R.D.G).

### 579 Author Contributions

580 MK, TS, SA, and RDG conceived of the study. TS and MK performed the light microscopy ex-  
581 periments. MT and OM analyzed Cryo-ET data. MK and SA ran the Western blots. JRT and YZ  
582 provided lamin null cell lines. MK and KJ performed the image and statistical analysis. MK, TS, and  
583 MT prepared the figures. All authors contributed to the writing of the paper.

### 584 Author ORCIDs

- 585 • Mark Kittisopikul <https://orcid.org/0000-0002-9558-6248>
- 586 • Takeshi Shimi <https://orcid.org/0000-0002-9864-1820>
- 587 • Joseph R. Tran <https://orcid.org/0000-0002-7467-8995>
- 588 • Yixian Zheng <https://orcid.org/0000-0002-1992-4014>
- 589 • Ohad Medalia <https://orcid.org/0000-0003-0994-2937>
- 590 • Khuloud Jaqaman <http://orcid.org/0000-0003-3471-1911>
- 591 • Stephen A. Adam <https://orcid.org/0000-0003-3444-7655>
- 592 • Robert D. Goldman <http://orcid.org/0000-0003-0383-1435>

## 593 References

- 594 **Aebi U**, Cohn J, Buhle L, Gerace L. The nuclear lamina is a meshwork of intermediate-type filaments. *Nature*.  
595 1986 oct; 323(6088):560-564. <https://doi.org/10.1038%2F323560a0>, doi: 10.1038/323560a0.
- 596 **Al-Haboubi T**, Shumaker DK, Köser J, Wehnert M, Fahrenkrog B. Distinct association of the nuclear pore protein  
597 Nup153 with A- and B-type lamins. *Nucleus*. 2011 sep; 2(5):500-509. <https://doi.org/10.4161%2Fnucl.2.5.17913>,  
598 doi: 10.4161/nucl.2.5.17913.
- 599 **Beck M**, Hurt E. The nuclear pore complex: understanding its function through structural insight. *Nature Reviews Molecular Cell Biology*. 2016 dec; 18(2):73-89. <https://doi.org/10.1038%2Fnrnm.2016.147>, doi:  
600 10.1038/nrm.2016.147.  
601
- 602 **Biamonti G**, Giacca M, Perini G, Contreas G, Zentilin L, Weighardt F, Guerra M, Valle GD, Saccone S, Riva S. The  
603 gene for a novel human lamin maps at a highly transcribed locus of chromosome 19 which replicates at  
604 the onset of S-phase. *Molecular and Cellular Biology*. 1992 aug; 12(8):3499-3506. <https://doi.org/10.1128%2Fmcb.12.8.3499>,  
605 doi: 10.1128/mcb.12.8.3499.
- 606 **Broers JL**, Machiels BM, van Eys GJ, Kuijpers HJ, Manders EM, van Driel R, Ramaekers FC. Dynamics of the  
607 nuclear lamina as monitored by GFP-tagged A-type lamins. *Journal of Cell Science*. 1999; 112(20):3463-3475.  
608 <https://jcs.biologists.org/content/112/20/3463>.
- 609 **Dechat T**, Shimi T, Adam SA, Rusinol AE, Andres DA, Spielmann HP, Sinensky MS, Goldman RD. Alterations in  
610 mitosis and cell cycle progression caused by a mutant lamin A known to accelerate human aging. *Proceedings*  
611 *of the National Academy of Sciences*. 2007 Mar; 104(12):4955-4960. <https://doi.org/10.1073/pnas.0700854104>,  
612 doi: 10.1073/pnas.0700854104.
- 613 **Dessev G**, Iovcheva-Dessev C, Bischoff JR, Beach D, Goldman R. A complex containing p34cdc2 and cyclin  
614 B phosphorylates the nuclear lamin and disassembles nuclei of clam oocytes in vitro. *The Journal of Cell*  
615 *Biology*. 1991 feb; 112(4):523-533. <https://doi.org/10.1083%2Fjcb.112.4.523>, doi: 10.1083/jcb.112.4.523.
- 616 **Doucet CM**, Talamas JA, Hetzer MW. Cell Cycle-Dependent Differences in Nuclear Pore Complex Assem-  
617 bly in Metazoa. *Cell*. 2010 jun; 141(6):1030-1041. <https://doi.org/10.1016%2Fj.cell.2010.04.036>, doi:  
618 10.1016/j.cell.2010.04.036.

- 619 **Duheron V**, Chatel G, Sauder U, Oliveri V, Fahrenkrog B. Structural characterization of altered nucleoporin  
620 Nup153 expression in human cells by thin-section electron microscopy. *Nucleus*. 2014 nov; 5(6):601–612.  
621 <https://doi.org/10.4161%2F19491034.2014.990853>, doi: 10.4161/19491034.2014.990853.
- 622 **Dwyer N**, Blobel G. A modified procedure for the isolation of a pore complex-lamina fraction from rat liver  
623 nuclei. *The Journal of Cell Biology*. 1976 sep; 70(3):581–591. <https://doi.org/10.1083%2Fjcb.70.3.581>, doi:  
624 10.1083/jcb.70.3.581.
- 625 **Favreau C**, Worman HJ, Wozniak RW, Frappier T, Courvalin JC. Cell Cycle-Dependent Phosphorylation of  
626 Nucleoporins and Nuclear Pore Membrane Protein Gp210†. *Biochemistry*. 1996 jan; 35(24):8035–8044.  
627 <https://doi.org/10.1021%2Fbi9600660>, doi: 10.1021/bi9600660.
- 628 **Fawcett DW**. On the occurrence of a fibrous lamina on the inner aspect of the nuclear envelope in certain  
629 cells of vertebrates. *American Journal of Anatomy*. 1966 jul; 119(1):129–145. <https://doi.org/10.1002%2Faja.1001190108>, doi:  
630 10.1002/aja.1001190108.
- 631 **Fisher DZ**, Chaudhary N, Blobel G. cDNA sequencing of nuclear lamins A and C reveals primary and secondary  
632 structural homology to intermediate filament proteins. *Proceedings of the National Academy of Sciences*.  
633 1986 sep; 83(17):6450–6454. <https://doi.org/10.1073%2Fpnas.83.17.6450>, doi: 10.1073/pnas.83.17.6450.
- 634 **Foisner R**, Gerace L. Integral membrane proteins of the nuclear envelope interact with lamins and chro-  
635 mosomes, and binding is modulated by mitotic phosphorylation. *Cell*. 1993 jul; 73(7):1267–1279. <https://doi.org/10.1016%2F0092-8674%2893%2990355-t>, doi: 10.1016/0092-8674(93)90355-t.
- 637 **Franz C**, Walczak R, Yavuz S, Santarella R, Gentzel M, Askjaer P, Galy V, Hetzer M, Mattaj JW, Antonin W. MEL-  
638 28/ELYS is required for the recruitment of nucleoporins to chromatin and postmitotic nuclear pore com-  
639 plex assembly. *EMBO reports*. 2007 jan; 8(2):165–172. <https://doi.org/10.1038%2Fsj.embor.7400889>, doi:  
640 10.1038/sj.embor.7400889.
- 641 **Gerace L**, Blobel G. The nuclear envelope lamina is reversibly depolymerized during mitosis. *Cell*. 1980 jan;  
642 19(1):277–287. <https://doi.org/10.1016%2F0092-8674%2880%2990409-2>, doi: 10.1016/0092-8674(80)90409-2.
- 643 **Goldman AE**, Maul G, Steinert PM, Yang HY, Goldman RD. Keratin-like proteins that coisolate with intermediate  
644 filaments of BHK-21 cells are nuclear lamins. *Proceedings of the National Academy of Sciences*. 1986 jun;  
645 83(11):3839–3843. <https://doi.org/10.1073%2Fpnas.83.11.3839>, doi: 10.1073/pnas.83.11.3839.
- 646 **Goldman RD**, Shumaker DK, Erdos MR, Eriksson M, Goldman AE, Gordon LB, Gruenbaum Y, Khuon S, Mendez  
647 M, Varga R, Collins FS. Accumulation of mutant lamin A causes progressive changes in nuclear architec-  
648 ture in Hutchinson–Gilford progeria syndrome. *Proceedings of the National Academy of Sciences*. 2004 jun;  
649 101(24):8963–8968. <https://doi.org/10.1073%2Fpnas.0402943101>, doi: 10.1073/pnas.0402943101.
- 650 **Guelen L**, Pagie L, Brassat E, Meuleman W, Faza MB, Talhout W, Eussen BH, de Klein A, Wessels L, de Laat  
651 W, van Steensel B. Domain organization of human chromosomes revealed by mapping of nuclear lamina  
652 interactions. *Nature*. 2008 may; 453(7197):948–951. <https://doi.org/10.1038%2Fnature06947>, doi: 10.1038/nature06947.
- 654 **Guo Y**, Zheng Y. Lamins position the nuclear pores and centrosomes by modulating dynein. *Molecular Biology*  
655 *of the Cell*. 2015 oct; 26(19):3379–3389. <https://doi.org/10.1091%2Fmbc.e15-07-0482>, doi: 10.1091/mbc.e15-  
656 07-0482.
- 657 **Hase ME**, Cordes VC. Direct Interaction with Nup153 Mediates Binding of Tpr to the Periphery of the Nuclear  
658 Pore Complex. *Molecular Biology of the Cell*. 2003 may; 14(5):1923–1940. <https://doi.org/10.1091%2Fmbc.e02-09-0620>, doi:  
659 10.1091/mbc.e02-09-0620.
- 660 **Höger TH**, Zatloukal K, Waizenegger I, Krohne G. Characterization of a second highly conserved B-type lamin  
661 present in cells previously thought to contain only a single B-type lamin. *Chromosoma*. 1990 oct; 99(6):379–  
662 390. <https://doi.org/10.1007%2Fbf01726689>, doi: 10.1007/bf01726689.
- 663 **Ibarra A**, Hetzer MW. Nuclear pore proteins and the control of genome functions. *Genes & Development*. 2015  
664 feb; 29(4):337–349. <https://doi.org/10.1101%2Fgad.256495.114>, doi: 10.1101/gad.256495.114.
- 665 **Kay RR**, Fraser D, Johnston IR. A Method for the Rapid Isolation of Nuclear Membranes from Rat Liver. Charac-  
666 terisation of the Membrane Preparation and Its Associated DNA Polymerase. *European Journal of Biochem-*  
667 *istry*. 1972 oct; 30(1):145–154. <https://doi.org/10.1111%2Fj.1432-1033.1972.tb02081.x>, doi: 10.1111/j.1432-  
668 1033.1972.tb02081.x.

- 669 **Kim Y**, Sharov AA, McDole K, Cheng M, Hao H, Fan CM, Gaiano N, Ko MSH, Zheng Y. Mouse B-Type Lamins Are  
670 Required for Proper Organogenesis But Not by Embryonic Stem Cells. *Science*. 2011 nov; 334(6063):1706-  
671 1710. <https://doi.org/10.1126%2Fscience.1211222>, doi: 10.1126/science.1211222.
- 672 **Kim Y**, Zheng Y. Generation and characterization of a conditional deletion allele for Lmna in mice. *Biochemical  
673 and Biophysical Research Communications*. 2013 Oct; 440(1):8-13. <https://doi.org/10.1016/j.bbrc.2013.08.082>,  
674 doi: 10.1016/j.bbrc.2013.08.082.
- 675 **Kittisopikul M**, Vahabikashi A, Shimi T, Goldman RD, Jaqaman K. Adaptive-Resolution Multi-Orientation  
676 Analysis of Complex Filamentous Network Images. . 2019 sep; <https://doi.org/10.1101%2F757005>, doi:  
677 10.1101/757005.
- 678 **Kochin V**, Shimi T, Torvaldson E, Adam SA, Goldman A, Pack CG, Melo-Cardenas J, Imanishi SY, Goldman RD,  
679 Eriksson JE. Interphase phosphorylation of lamin A. *Journal of Cell Science*. 2014 apr; 127(12):2683-2696.  
680 <https://doi.org/10.1242%2Fjcs.141820>, doi: 10.1242/jcs.141820.
- 681 **Krull S**, Thyberg J, Björkroth B, Rackwitz HR, Cordes VC. Nucleoporins as Components of the Nuclear Pore  
682 Complex Core Structure and Tpr as the Architectural Element of the Nuclear Basket. *Molecular Biology of  
683 the Cell*. 2004 sep; 15(9):4261-4277. <https://doi.org/10.1091%2Fmbc.e04-03-0165>, doi: 10.1091/mbc.e04-03-  
684 0165.
- 685 **Lin F**, Worman HJ. Structural organization of the human gene encoding nuclear lamin A and nuclear lamin  
686 C. *Journal of Biological Chemistry*. 1993; 268(22):16321-16326. [http://www.jbc.org/content/268/22/16321.  
687 abstract](http://www.jbc.org/content/268/22/16321.abstract).
- 688 **Lin F**, Worman HJ. Structural Organization of the Human Gene (LMNB1) Encoding Nuclear Lamin B1. *Genomics*.  
689 1995 may; 27(2):230-236. <https://doi.org/10.1006%2Fgeno.1995.1036>, doi: 10.1006/geno.1995.1036.
- 690 **Linkert M**, Rueden CT, Allan C, Burel JM, Moore W, Patterson A, Loranger B, Moore J, Neves C, MacDonald D,  
691 Tarkowska A, Sticco C, Hill E, Rossner M, Eliceiri KW, Swedlow JR. Metadata matters: access to image data in  
692 the real world. *The Journal of Cell Biology*. 2010 May; 189(5):777-782. <https://doi.org/10.1083/jcb.201004104>,  
693 doi: 10.1083/jcb.201004104.
- 694 **Macaulay C**, Meier E, Forbes DJ. Differential Mitotic Phosphorylation of Proteins of the Nuclear Pore Com-  
695 plex. *Journal of Biological Chemistry*. 1995 jan; 270(1):254-262. <https://doi.org/10.1074%2Fjbc.270.1.254>, doi:  
696 10.1074/jbc.270.1.254.
- 697 **Maeno H**, Sugimoto K, Nakajima N. Genomic Structure of the Mouse Gene (Lmnb1) Encoding Nu-  
698 clear Lamin B1. *Genomics*. 1995 nov; 30(2):342-346. <https://doi.org/10.1006%2Fgeno.1995.9868>, doi:  
699 10.1006/geno.1995.9868.
- 700 **Maul G**. Studies in ultrastructure. International review of cytology : Supplement ; 6, New York: Academic Press;  
701 1977.
- 702 **McCloskey A**, Ibarra A, Hetzer MW. Tpr regulates the total number of nuclear pore complexes per cell nu-  
703 cleus. *Genes & Development*. 2018 sep; 32(19-20):1321-1331. <https://doi.org/10.1101%2Fgad.315523.118>,  
704 doi: 10.1101/gad.315523.118.
- 705 **McKeon FD**, Kirschner MW, Caput D. Homologies in both primary and secondary structure between nuclear  
706 envelope and intermediate filament proteins. *Nature*. 1986 feb; 319(6053):463-468. [https://doi.org/10.1038%  
707 2F319463a0](https://doi.org/10.1038%2F319463a0), doi: 10.1038/319463a0.
- 708 **Moir RD**, Yoon M, Khuon S, Goldman RD. Nuclear Lamins a and B1. *The Journal of Cell Biology*. 2000 dec;  
709 151(6):1155-1168. <https://doi.org/10.1083%2Fjcb.151.6.1155>, doi: 10.1083/jcb.151.6.1155.
- 710 **Nickell S**, Förster F, Linaroudis A, Net WD, Beck F, Hegerl R, Baumeister W, Plitzko JM. TOM software toolbox:  
711 acquisition and analysis for electron tomography. *Journal of Structural Biology*. 2005 Mar; 149(3):227-234.  
712 <https://doi.org/10.1016/j.jsb.2004.10.006>, doi: 10.1016/j.jsb.2004.10.006.
- 713 **Ou HD**, Phan S, Deerinck TJ, Thor A, Ellisman MH, O'Shea CC. ChromEMT: Visualizing 3D chromatin structure  
714 and compaction in interphase and mitotic cells. *Science*. 2017 jul; 357(6349):eaag0025. [https://doi.org/10.  
715 1126%2Fscience.aag0025](https://doi.org/10.1126%2Fscience.aag0025), doi: 10.1126/science.aag0025.
- 716 **Peric-Hupkes D**, Meuleman W, Pagie L, Bruggeman SWM, Solovei I, Brugman W, Gräf S, Flicek P, Kerkhoven RM,  
717 van Lohuizen M, Reinders M, Wessels L, van Steensel B. Molecular Maps of the Reorganization of Genome-  
718 Nuclear Lamina Interactions during Differentiation. *Molecular Cell*. 2010 may; 38(4):603-613. [https://doi.  
719 org/10.1016%2Fj.molcel.2010.03.016](https://doi.org/10.1016%2Fj.molcel.2010.03.016), doi: 10.1016/j.molcel.2010.03.016.

- 720 **Peter M**, Nakagawa J, Dorée M, Labbé JC, Nigg EA. In vitro disassembly of the nuclear lamina and M phase-  
721 specific phosphorylation of lamins by cdc2 kinase. *Cell*. 1990 may; 61(4):591–602. [https://doi.org/10.1016%](https://doi.org/10.1016%2F0092-8674%2890%2990471-p)  
722 [2F0092-8674%2890%2990471-p](https://doi.org/10.1016/0092-8674(90)90471-p), doi: 10.1016/0092-8674(90)90471-p.
- 723 **Rabut G**, Doye V, Ellenberg J. Mapping the dynamic organization of the nuclear pore complex inside sin-  
724 gle living cells. *Nature Cell Biology*. 2004 oct; 6(11):1114–1121. <https://doi.org/10.1038%2Fncb1184>, doi:  
725 10.1038/ncb1184.
- 726 **Rasala BA**, Orjalo AV, Shen Z, Briggs S, Forbes DJ. ELYS is a dual nucleoporin/kinetochore protein required for  
727 nuclear pore assembly and proper cell division. *Proceedings of the National Academy of Sciences*. 2006 nov;  
728 103(47):17801–17806. <https://doi.org/10.1073%2Fpnas.0608484103>, doi: 10.1073/pnas.0608484103.
- 729 **Rasala BA**, Ramos C, Harel A, Forbes DJ. Capture of AT-rich Chromatin by ELYS Recruits POM121 and NDC1 to  
730 Initiate Nuclear Pore Assembly. *Molecular Biology of the Cell*. 2008 sep; 19(9):3982–3996. [https://doi.org/10.](https://doi.org/10.1091%2Fmbc.e08-01-0012)  
731 [1091%2Fmbc.e08-01-0012](https://doi.org/10.1091/mbc.e08-01-0012), doi: 10.1091/mbc.e08-01-0012.
- 732 **Roux KJ**, Kim DI, Raida M, Burke B. A promiscuous biotin ligase fusion protein identifies proximal and interacting  
733 proteins in mammalian cells. *Journal of Cell Biology*. 2012 mar; 196(6):801–810. [https://doi.org/10.1083%](https://doi.org/10.1083%2Fjcb.201112098)  
734 [2Fjcb.201112098](https://doi.org/10.1083/jcb.201112098), doi: 10.1083/jcb.201112098.
- 735 **Scheer U**, Kartenbeck J, Trendelenburg MF, Stadler J, Franke WW. Experimental disintegration of the nuclear  
736 envelope. Evidence for pore-connecting fibrils. *The Journal of Cell Biology*. 1976 apr; 69(1):1–18. [https://doi.](https://doi.org/10.1083%2Fjcb.69.1.1)  
737 [org/10.1083%2Fjcb.69.1.1](https://doi.org/10.1083/jcb.69.1.1), doi: 10.1083/jcb.69.1.1.
- 738 **Shimi T**, Kittisopikul M, Tran J, Goldman AE, Adam SA, Zheng Y, Jaqaman K, Goldman RD. Structural organization  
739 of nuclear lamins A, C, B1, and B2 revealed by superresolution microscopy. *Molecular Biology of the Cell*.  
740 2015 nov; 26(22):4075–4086. <https://doi.org/10.1091%2Fmbc.e15-07-0461>, doi: 10.1091/mbc.e15-07-0461.
- 741 **Stelzer**. Contrast, resolution, pixelation, dynamic range and signal-to-noise ratio: fundamental limits to reso-  
742 lution in fluorescence light microscopy. *Journal of Microscopy*. 1998 Jan; 189(1):15–24. [https://doi.org/10.](https://doi.org/10.1046/j.1365-2818.1998.00290.x)  
743 [1046/j.1365-2818.1998.00290.x](https://doi.org/10.1046/j.1365-2818.1998.00290.x), doi: 10.1046/j.1365-2818.1998.00290.x.
- 744 **Sullivan T**, Escalante-Alcalde D, Bhatt H, Anver M, Bhat N, Nagashima K, Stewart CL, Burke B. Loss of a-Type  
745 Lamin Expression Compromises Nuclear Envelope Integrity Leading to Muscular Dystrophy. *The Journal of*  
746 *Cell Biology*. 1999 nov; 147(5):913–920. <https://doi.org/10.1083%2Fjcb.147.5.913>, doi: 10.1083/jcb.147.5.913.
- 747 **Tatli M**, Medalia O. Insight into the functional organization of nuclear lamins in health and disease.  
748 *Current Opinion in Cell Biology*. 2018 oct; 54:72–79. <https://doi.org/10.1016%2Fj.ceb.2018.05.001>, doi:  
749 [10.1016/j.ceb.2018.05.001](https://doi.org/10.1016/j.ceb.2018.05.001).
- 750 **Toda T**, Hsu JY, Linker SB, Hu L, Schafer ST, Mertens J, Jacinto FV, Hetzer MW, Gage FH. Nup153 Interacts with  
751 Sox2 to Enable Bimodal Gene Regulation and Maintenance of Neural Progenitor Cells. *Cell Stem Cell*. 2017  
752 nov; 21(5):618–634.e7. <https://doi.org/10.1016%2Fj.stem.2017.08.012>, doi: 10.1016/j.stem.2017.08.012.
- 753 **Turgay Y**, Eibauer M, Goldman AE, Shimi T, Khayat M, Ben-Harush K, Dubrovsky-Gaupp A, Sapra KT, Goldman  
754 RD, Medalia O. The molecular architecture of lamins in somatic cells. *Nature*. 2017 mar; 543(7644):261–264.  
755 <https://doi.org/10.1038%2Fnature21382>, doi: 10.1038/nature21382.
- 756 **Unser M**. Splines: a perfect fit for signal and image processing. *IEEE Signal Processing Magazine*. 1999; 16(6):22–  
757 38. <https://doi.org/10.1109/79.799930>, doi: 10.1109/79.799930.
- 758 **Vergnes L**, Peterfy M, Bergo MO, Young SG, Reue K. Lamin B1 is required for mouse development and nuclear  
759 integrity. *Proceedings of the National Academy of Sciences*. 2004 jul; 101(28):10428–10433. [https://doi.org/](https://doi.org/10.1073%2Fpnas.0401424101)  
760 [10.1073%2Fpnas.0401424101](https://doi.org/10.1073/pnas.0401424101), doi: 10.1073/pnas.0401424101.
- 761 **Walther TC**. The nucleoporin Nup153 is required for nuclear pore basket formation, nuclear pore complex  
762 anchoring and import of a subset of nuclear proteins. *The EMBO Journal*. 2001 oct; 20(20):5703–5714. <https://doi.org/10.1093%2Femboj%2F20.20.5703>, doi: 10.1093/emboj/20.20.5703.
- 764 **Xie W**, Chojnowski A, Boudier T, Lim JSY, Ahmed S, Ser Z, Stewart C, Burke B. A-type Lamins Form Distinct  
765 Filamentous Networks with Differential Nuclear Pore Complex Associations. *Current Biology*. 2016 oct;  
766 26(19):2651–2658. <https://doi.org/10.1016%2Fj.cub.2016.07.049>, doi: 10.1016/j.cub.2016.07.049.



## 767 Appendix 1

### 768 Localization of Lamin Fibers in Orientation Space

769 In order to localize lamin fibers, we use an image analysis algorithm that we previously  
770 developed that involves the construction of a three dimensional orientation space by aug-  
771 menting a 2-D image with orientation as an additional third dimension *Kittisopikul et al.*  
772 (2019). There we focused on addressing the continuous nature of the orientation dimension,  
773 we leave the spatial dimensions discretely sampled and localize line detections to nearest  
774 pixel in the Non-Maximum Suppression (NMS) and Non-Local Maxima Suppression (NLMS)  
775 procedures.

Here we extend the procedure by using the orientations to localize lines, the lamin fibers,  
to sub-pixel precision by also treating the spatial dimensions as continuous. Given suffi-  
cient signal-to-noise ratios and sampling in excess of that required by the Nyquist-Shannon-  
Whittaker-Kotelnikov sampling theorem, the spatial dimension could also be treated contin-  
uously through interpolation. In particular, we use spline interpolation (*Unser, 1999*). In that  
case, we can state the localization problem as solving a system of partial differential equa-  
tions where  $R(x, y, \theta; K)$  is the steerable filter response at some location  $(x, y)$  at orientation  
 $\theta$  at the orientation-resolution  $K$ .

For  $\vec{v} = (\cos(\phi), \sin(\phi))$ , we want all  $(x, y, \phi)$  such that

$$\begin{aligned} \frac{\partial R(x, y, \phi; K_1)}{\partial \phi} &= 0, & \frac{\partial^2 R(x, y, \phi; K_1)}{\partial \phi^2} &< 0 \\ \frac{\partial R(x, y, \phi; K_2)}{\partial \vec{v}} &= 0 = \frac{\partial R(x, y, \phi; K_2)}{\partial x} \cos(\phi) + \frac{\partial R(x, y, \phi; K_2)}{\partial y} \sin(\phi) \\ \frac{\partial^2 R(x, y, \phi; K_2)}{\partial \vec{v}^2} &< 0 \end{aligned}$$

$\vec{v}$  is a vector normal to the structure being localized. As explained in *Kittisopikul et al. (2019)*,  
 $K_1$  and  $K_2$  may differ since the orientation resolution used for orientation detection may  
differ from the orientation resolution used to localize the detection in space.

### 790 Localization of Lamin Meshwork Face Centers

791 To understand the relationship of NPCs to the lamin structure, we also measured the  
792 distance of the NPCs from their "centers" which we defined as the points furthest away  
793 from the lamins within a local neighborhood.

794 Face centers were localized by identifying local maxima of the distance transform rela-  
795 tive to the lamin fibers. A 2D disc with a five pixel radius (150 nm) was used as a structuring  
796 element with morphological dilation. This identified the maximum distance within a disc  
797 centered at each pixel. The local maxima were detected at the points when the maximum  
798 distance within the disc coincided with an identical distance assigned to that pixel via the  
799 distance transform. If a connected region with points equidistant from the lamin fibers were  
800 found, the centroid of that region was selected as the face center.

801 Because faces are not always convex or there maybe lamin fibers protruding into faces,  
802 multiple distinct centers may be detected. In this case, the distance from the NPC is mea-  
803 sured to the nearest face center.

**Table 1A: Lamin Fiber<sub>804</sub> NPC Center to Center Distance Distributions**

| Cell Genotype | Lamin Labeled | Observed (nm) |          | Expected (nm) |          | Obs. - Exp. (nm) |          | P-Values |          | Num. of NPCs N |
|---------------|---------------|---------------|----------|---------------|----------|------------------|----------|----------|----------|----------------|
|               |               | Median        | St. Dev. | Median        | St. Dev. | Median           | St. Dev. | Median   | St. Dev. |                |
| wt            | LA            | 40.4          | 38.0     | 33.5          | 56.5     | 6.9              | -18.5    | 0.00     |          | 14780          |
| wt            | LC            | 32.8          | 35.0     | 32.1          | 49.4     | 0.7              | -14.5    | 0.37     | 0.01     | 11459          |
| wt            | LB1           | 38.1          | 36.2     | 32.1          | 56.9     | 6.0              | -20.7    | 0.00     |          | 15150          |
| wt            | LB2           | 27.6          | 29.2     | 28.1          | 38.7     | -0.6             | -9.6     | 0.00     |          | 17146          |
| Lmnb1-/-      | LA            | 45.1          | 48.6     | 42.4          | 216.8    | 2.7              | -168.2   | 0.59     | 0.00     | 11971          |
| Lmna-/-       | LB1           | 34.9          | 34.5     | 35.8          | 297.7    | -0.8             | -263.1   | 0.00     |          | 9740           |

Caption: Median and standard deviation of the observed and expected lamin fiber to NPC center to center distances, the difference between them, p-values (see Methods), and number of NPCs

**Table 1B: Face - NPC Center to Center Distance Distributions**

| Cell Genotype | Lamin Labeled | Observed (nm) |          | Expected (nm) |          | Obs. - Exp. (nm) |          | P-Values |          | Num. of NPCs N |
|---------------|---------------|---------------|----------|---------------|----------|------------------|----------|----------|----------|----------------|
|               |               | Median        | St. Dev. | Median        | St. Dev. | Median           | St. Dev. | Median   | St. Dev. |                |
| wt            | LA            | 119.3         | 62.6     | 130.9         | 78.3     | -11.7            | -15.7    | 0.00     |          | 14780          |
| wt            | LC            | 122.4         | 57.1     | 125.7         | 69.0     | -3.3             | -11.9    | 0.00     |          | 11459          |
| wt            | LB1           | 118.3         | 56.8     | 129.1         | 76.0     | -10.8            | -19.2    | 0.00     |          | 15150          |
| wt            | LB2           | 116.7         | 51.5     | 117.3         | 58.9     | -0.6             | -7.3     | 0.25     | 0.08     | 17146          |
| Lmnb1-/-      | LA            | 124.0         | 90.0     | 146.0         | 235.2    | -22.0            | -145.2   | 0.00     |          | 11971          |
| Lmna-/-       | LB1           | 122.1         | 55.7     | 133.2         | 304.3    | -11.1            | -248.6   | 0.00     |          | 9740           |

Caption: Median and standard deviation of the observed and expected lamin face to NPC distances, the difference between them, p-values (see Methods), and number of NPCs.

805

**Table 2A: Lamin Fiber to NPC Center to Center Distance Distributions**

| siRNA Knockdown | Lamin Labeled | Observed (nm) |          | Expected (nm) |          | Obs. - Exp. (nm) |          | P vs Exp. |          | Obs. - Scram. |        | P vs Scram. |        | Num. of NPCs |  |
|-----------------|---------------|---------------|----------|---------------|----------|------------------|----------|-----------|----------|---------------|--------|-------------|--------|--------------|--|
|                 |               | Median        | St. Dev. | Median        | St. Dev. | Median           | St. Dev. | Median    | St. Dev. | Median (nm)   | Median | Median      | Median | N            |  |
| Scrambled       | LA            | 50.9          | 39.5     | 33.6          | 40.4     | 17.3             | -0.9     | 0.00      |          |               |        |             |        | 39096        |  |
| TPR KD          | LA            | 59.0          | 39.5     | 31.9          | 36.9     | 27.1             | 2.6      | 0.00      |          | 8.2           | 0.00   |             |        | 40767        |  |
| NUP153 KD       | LA            | 50.1          | 38.6     | 31.1          | 35.7     | 19.0             | 2.8      | 0.00      |          | -0.8          | 0.00   |             |        | 36066        |  |
| ELYS KD         | LA            | 70.8          | 48.9     | 32.9          | 42.4     | 37.9             | 6.5      | 0.00      |          | 20.0          | 0.00   |             |        | 21521        |  |
| Scrambled       | LC            | 42.9          | 36.1     | 31.7          | 42.6     | 11.2             | -6.5     | 0.00      |          |               |        |             |        | 37760        |  |
| TPR KD          | LC            | 56.6          | 38.1     | 31.2          | 54.4     | 25.4             | -16.2    | 0.00      |          | 13.7          | 0.00   |             |        | 35489        |  |
| NUP153 KD       | LC            | 39.9          | 35.1     | 29.8          | 35.6     | 10.1             | -0.5     | 0.00      |          | -3.0          | 0.00   |             |        | 39988        |  |
| ELYS KD         | LC            | 63.1          | 46.7     | 32.8          | 44.2     | 30.3             | 2.6      | 0.00      |          | 20.2          | 0.00   |             |        | 27053        |  |
| Scrambled       | LB1           | 51.6          | 42.4     | 35.4          | 51.8     | 16.2             | -9.4     | 0.00      |          |               |        |             |        | 37383        |  |
| TPR KD          | LB1           | 52.1          | 38.4     | 31.3          | 49.0     | 20.8             | -10.6    | 0.00      |          | 0.5           | 0.00   |             |        | 40899        |  |
| NUP153 KD       | LB1           | 46.9          | 41.3     | 35.2          | 40.6     | 11.7             | 0.7      | 0.00      |          | -4.7          | 0.00   |             |        | 31145        |  |
| ELYS KD         | LB1           | 48.5          | 40.1     | 31.1          | 40.6     | 17.4             | -0.5     | 0.00      |          | -3.1          | 0.00   |             |        | 24981        |  |
| Scrambled       | LB2           | 30.1          | 33.8     | 34.4          | 67.2     | -4.4             | -33.4    | 0.00      |          |               |        |             |        | 35444        |  |
| TPR KD          | LB2           | 28.6          | 30.3     | 30.2          | 75.0     | -1.7             | -44.7    | 0.00      |          | -1.5          | 0.00   |             |        | 36974        |  |
| NUP153 KD       | LB2           | 25.6          | 30.9     | 32.3          | 39.9     | -6.6             | -9.0     | 0.00      |          | -4.4          | 0.00   |             |        | 31628        |  |
| ELYS KD         | LB2           | 34.2          | 33.8     | 31.2          | 40.2     | 3.0              | -6.3     | 0.00      |          | 4.1           | 0.00   |             |        | 25215        |  |

Caption: Median and standard deviation of the observed and expected lamin fiber to NPC center to center distances, the difference between them, p-values (see Methods), and number of NPCs. The distributions were also compared to scrambled siRNA control.

**Table 2B: Lamin Face to NPC Center to Center Distance Distributions**

| siRNA Knockdown | Lamin Labeled | Observed (nm) |          | Expected (nm) |          | Obs. - Exp. (nm) |          | P vs Exp. |          | Obs. - Scram. |        | P vs Scram. |        | Num. of NPCs |  |
|-----------------|---------------|---------------|----------|---------------|----------|------------------|----------|-----------|----------|---------------|--------|-------------|--------|--------------|--|
|                 |               | Median        | St. Dev. | Median        | St. Dev. | Median           | St. Dev. | Median    | St. Dev. | Median (nm)   | Median | Median      | Median | N            |  |
| Scrambled       | LA            | 106.2         | 60.6     | 132.0         | 63.6     | -25.8            | -3.0     | 0.00      |          | 0.0           | 1.00   |             |        | 39096        |  |
| TPR KD          | LA            | 90.0          | 58.0     | 127.1         | 60.0     | -37.1            | -2.0     | 0.00      |          | -16.2         | 0.00   |             |        | 40767        |  |
| NUP153 KD       | LA            | 99.7          | 57.0     | 126.2         | 58.0     | -26.6            | -1.1     | 0.00      |          | -6.5          | 0.00   |             |        | 36066        |  |
| ELYS KD         | LA            | 89.7          | 58.8     | 129.7         | 64.4     | -39.9            | -5.6     | 0.00      |          | -16.4         | 0.00   |             |        | 21521        |  |
| Scrambled       | LC            | 109.1         | 58.1     | 126.5         | 65.2     | -17.4            | -7.2     | 0.00      |          | 0.0           | 1.00   |             |        | 37760        |  |
| TPR KD          | LC            | 89.9          | 55.6     | 125.8         | 73.4     | -35.9            | -17.7    | 0.00      |          | -19.2         | 0.00   |             |        | 35489        |  |
| NUP153 KD       | LC            | 106.6         | 55.5     | 122.9         | 57.7     | -16.3            | -2.2     | 0.00      |          | -2.5          | 0.00   |             |        | 39988        |  |
| ELYS KD         | LC            | 96.1          | 59.3     | 129.9         | 65.9     | -33.7            | -6.6     | 0.00      |          | -13.0         | 0.00   |             |        | 27053        |  |
| Scrambled       | LB1           | 114.0         | 63.4     | 138.6         | 73.4     | -24.6            | -9.9     | 0.00      |          | 0.0           | 1.00   |             |        | 37383        |  |
| TPR KD          | LB1           | 96.7          | 56.9     | 126.6         | 68.4     | -30.0            | -11.4    | 0.00      |          | -17.3         | 0.00   |             |        | 40899        |  |
| NUP153 KD       | LB1           | 118.8         | 63.7     | 135.8         | 65.7     | -17.0            | -2.0     | 0.00      |          | 4.8           | 0.00   |             |        | 31145        |  |
| ELYS KD         | LB1           | 101.5         | 58.2     | 125.6         | 62.2     | -24.1            | -4.0     | 0.00      |          | -12.5         | 0.00   |             |        | 24981        |  |
| Scrambled       | LB2           | 138.8         | 59.7     | 134.6         | 85.8     | 4.2              | -26.1    | 0.00      |          | 0.0           | 1.00   |             |        | 35444        |  |
| TPR KD          | LB2           | 125.2         | 54.8     | 124.1         | 90.0     | 1.1              | -35.1    | 0.00      |          | -13.6         | 0.00   |             |        | 36974        |  |
| NUP153 KD       | LB2           | 139.7         | 60.4     | 129.1         | 64.1     | 10.6             | -3.7     | 0.00      |          | 0.9           | 0.00   |             |        | 31628        |  |
| ELYS KD         | LB2           | 120.6         | 56.4     | 126.5         | 62.4     | -5.9             | -6.0     | 0.00      |          | -18.2         | 0.00   |             |        | 25215        |  |

Caption: Median and standard deviation of the observed and expected lamin face to NPC distances, the difference between them, p-values (see Methods), and number of NPCs. The distributions were also compared to scrambled siRNA control.

**Table 2C: Face Radii Distributions (Fiber to NPC + Face to NPC)**

| siRNA Knockdown | Lamin Labeled | Observed (nm) |          | Expected (nm) |          | Obs. - Exp. (nm) |          | P vs Exp. |          | Obs. - Scram. |        | P vs Scram. |        | Num. of NPCs |  |
|-----------------|---------------|---------------|----------|---------------|----------|------------------|----------|-----------|----------|---------------|--------|-------------|--------|--------------|--|
|                 |               | Median        | St. Dev. | Median        | St. Dev. | Median           | St. Dev. | Median    | St. Dev. | Median (nm)   | Median | Median      | Median | N            |  |
| Scrambled       | LA            | 163.3         | 53.2     | 171.9         | 67.4     | -8.6             | -14.2    | 0.00      |          |               |        |             |        | 39096        |  |
| TPR KD          | LA            | 154.3         | 49.6     | 164.3         | 59.9     | -10.0            | -10.4    | 0.00      |          | -9.1          | 0.00   |             |        | 40767        |  |
| NUP153 KD       | LA            | 155.9         | 48.3     | 162.8         | 56.6     | -6.9             | -8.3     | 0.00      |          | -7.5          | 0.00   |             |        | 36066        |  |
| ELYS KD         | LA            | 169.7         | 50.9     | 168.9         | 72.3     | 0.8              | -21.3    | 0.38      | 0.00     | 6.3           | 0.00   |             |        | 21521        |  |
| Scrambled       | LC            | 157.0         | 50.8     | 163.3         | 77.4     | -6.4             | -26.6    | 0.00      |          |               |        |             |        | 37760        |  |
| TPR KD          | LC            | 150.8         | 47.0     | 161.5         | 103.3    | -10.7            | -56.2    | 0.00      |          | -6.2          | 0.00   |             |        | 35489        |  |
| NUP153 KD       | LC            | 152.8         | 47.3     | 157.8         | 58.9     | -4.9             | -11.7    | 0.00      |          | -4.1          | 0.00   |             |        | 39988        |  |
| ELYS KD         | LC            | 167.5         | 52.0     | 169.0         | 77.1     | -1.5             | -25.1    | 0.00      |          | 10.5          | 0.00   |             |        | 27053        |  |
| Scrambled       | LB1           | 174.7         | 54.7     | 181.8         | 92.2     | -7.1             | -37.5    | 0.00      |          |               |        |             |        | 37383        |  |
| TPR KD          | LB1           | 154.4         | 48.0     | 163.2         | 89.4     | -8.9             | -41.4    | 0.00      |          | -20.3         | 0.00   |             |        | 40899        |  |
| NUP153 KD       | LB1           | 173.6         | 56.1     | 178.1         | 67.1     | -4.4             | -11.0    | 0.00      |          | -1.1          | 0.06   |             |        | 31145        |  |
| ELYS KD         | LB1           | 157.1         | 48.8     | 162.1         | 70.6     | -5.0             | -21.7    | 0.00      |          | -17.6         | 0.00   |             |        | 24981        |  |
| Scrambled       | LB2           | 175.5         | 52.5     | 175.0         | 129.5    | 0.4              | -76.9    | 0.22      | 0.95     |               |        |             |        | 35444        |  |
| TPR KD          | LB2           | 159.0         | 47.7     | 158.7         | 147.2    | 0.3              | -99.4    | 0.16      | 0.40     | -16.4         | 0.00   |             |        | 36974        |  |
| NUP153 KD       | LB2           | 170.6         | 55.2     | 166.5         | 68.9     | 4.0              | -13.7    | 0.00      |          | -4.9          | 0.00   |             |        | 31628        |  |
| ELYS KD         | LB2           | 160.7         | 48.7     | 162.7         | 70.3     | -2.0             | -21.6    | 0.00      |          | -14.8         | 0.00   |             |        | 25215        |  |

Caption: Median and standard deviation of the observed and expected sum of lamin fiber and lamin face to NPC distances, the difference between them, p-values (see Methods), and number of NPCs. The distributions were also compared to scrambled siRNA control.



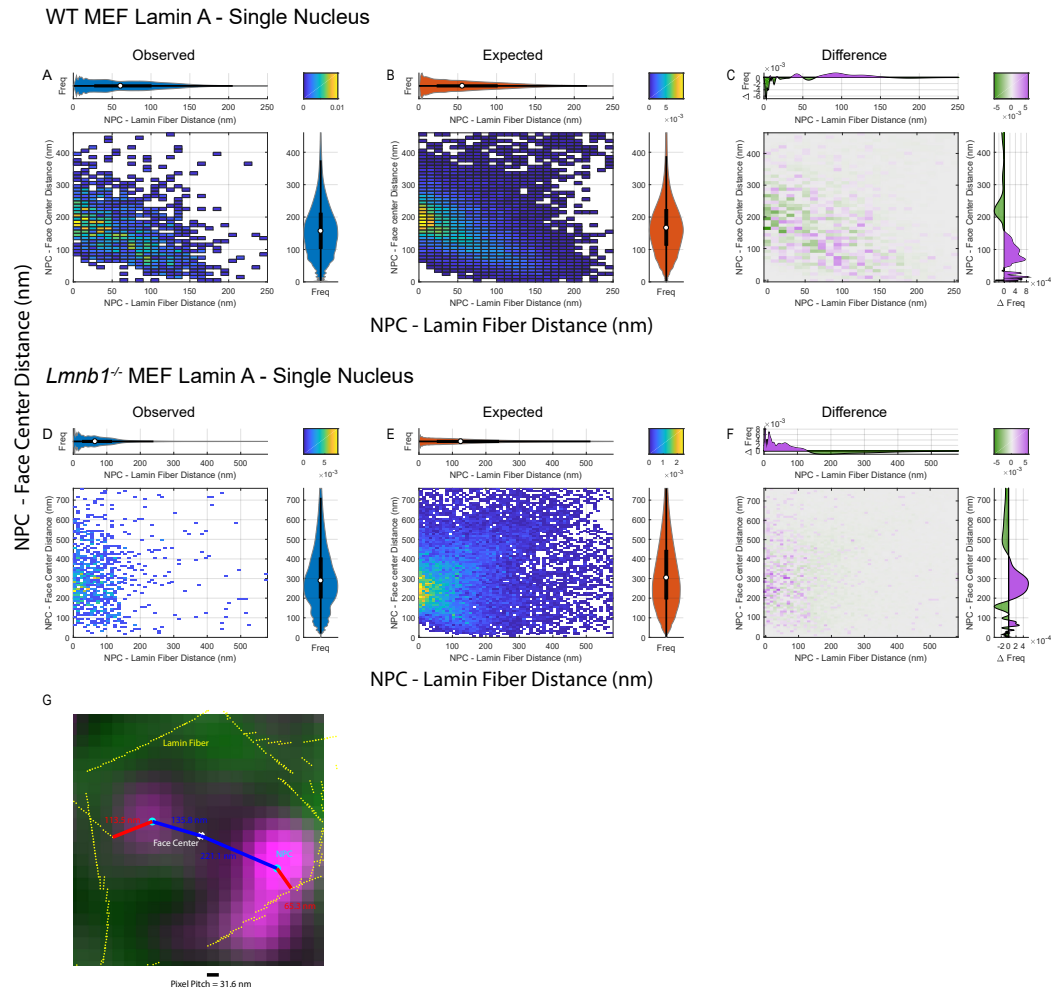

806

**Legend** A) Observed bivariate histogram of NPC to LA face center distances versus NPC to lamin A fiber distances of a single WT MEF Lamin A nucleus shown in panel A of the main figure. B) Expected bivariate histogram of NPC to lamin A face center distances versus NPC to lamin A fiber distances of a single WT MEF Lamin A nucleus under the null hypothesis. C) Difference between the observed and expected distance distributions with purple indicating where the observed exceeds the expected frequency and green showing when the observed frequency is less than the expected frequency. D-F) Same as A-C except for the single *Lmnb1*<sup>-/-</sup> nucleus shown in panel A of the main figure. Marginal violin plots and box plots of the distances correspond with the half-violin plot counterparts of the same orientation and color as in Panel B of the main figure. G) Zoomed in plot showing the NPC to lamin A fiber (red) and NPC to lamin A face center distances (blued) measured. Other colors correspond with those as in panel B of the main figure.

**Figure 2-Figure supplement 1.** Bivariate histograms of LA Fiber-NPC and Face Center-NPC Distances in Single Nuclei. Illustration of Distances.

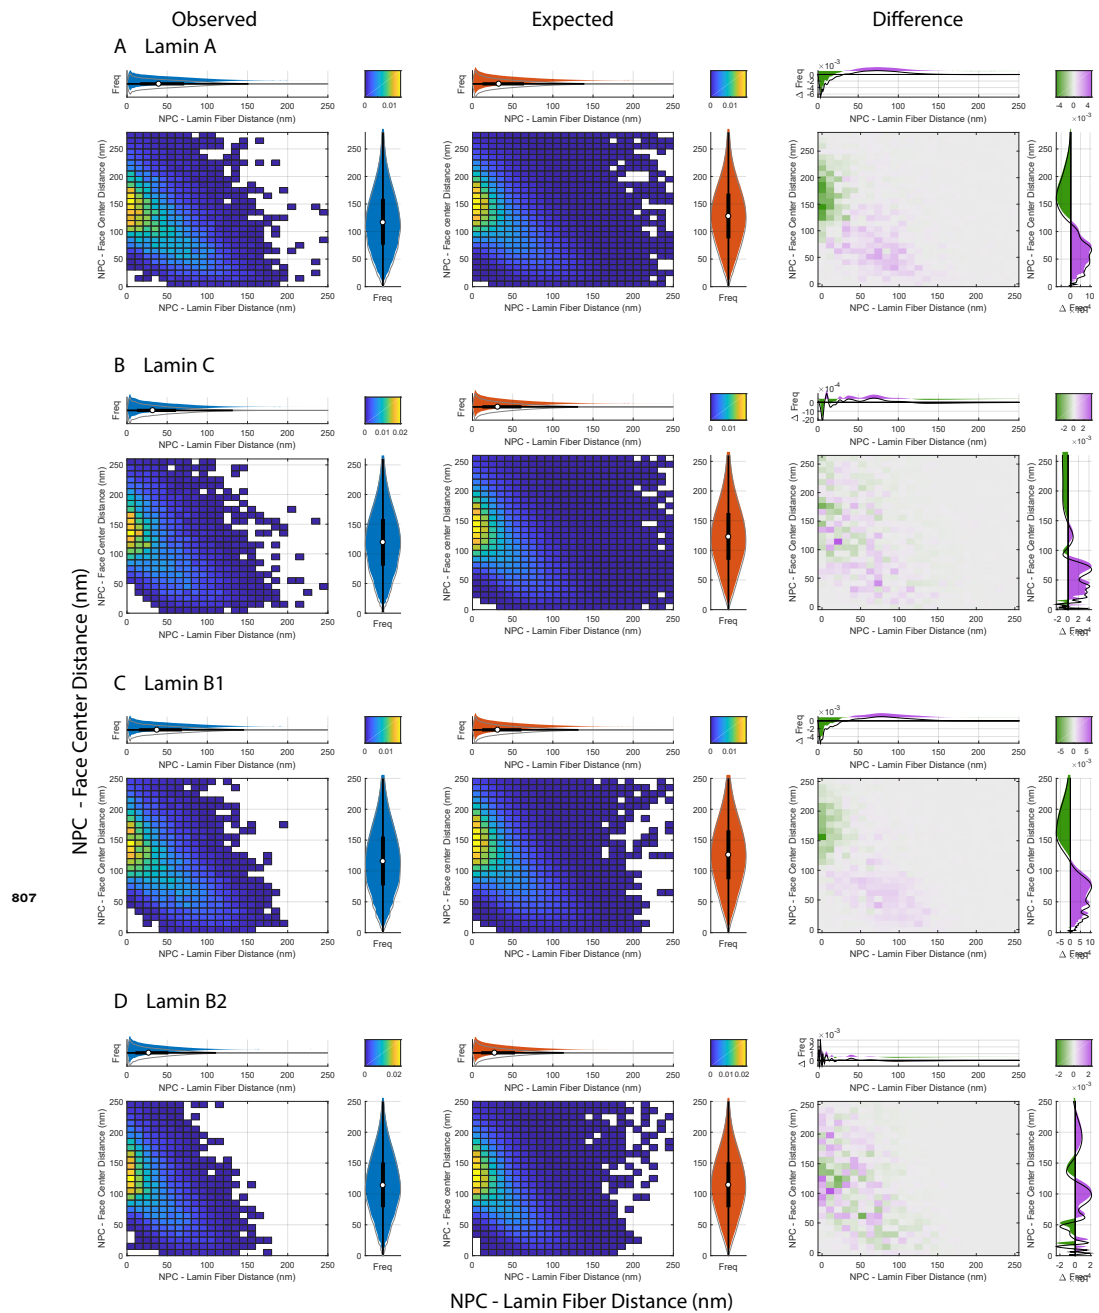

**Legend** A) First row shows a bivariate distribution of NPC to Lamin A fiber and face center distances in WT MEFs. B) Second row shows bivariate distributions of NPC to Lamin C fiber and face center distances. C) Third row shows bivariate distributions of NPC to Lamin B1 distances. D) Fourth row shows bivariate distributions of NPC to Lamin B2 distances. First column represents the observed bivariate distribution. Second column represents the expected bivariate distribution. Third column represents the difference between expected and observed. Difference between the observed and expected distance distributions with purple indicating where the observed exceeds the expected frequency and green showing when the observed frequency is less than the expected frequency. Marginal violin plots and box plots of the distances correspond with the half-violin plot counterparts of the same orientation and color as in Panel B of the main figure.

**Figure 3-Figure supplement 1.** Bivariate histograms of WT MEFs

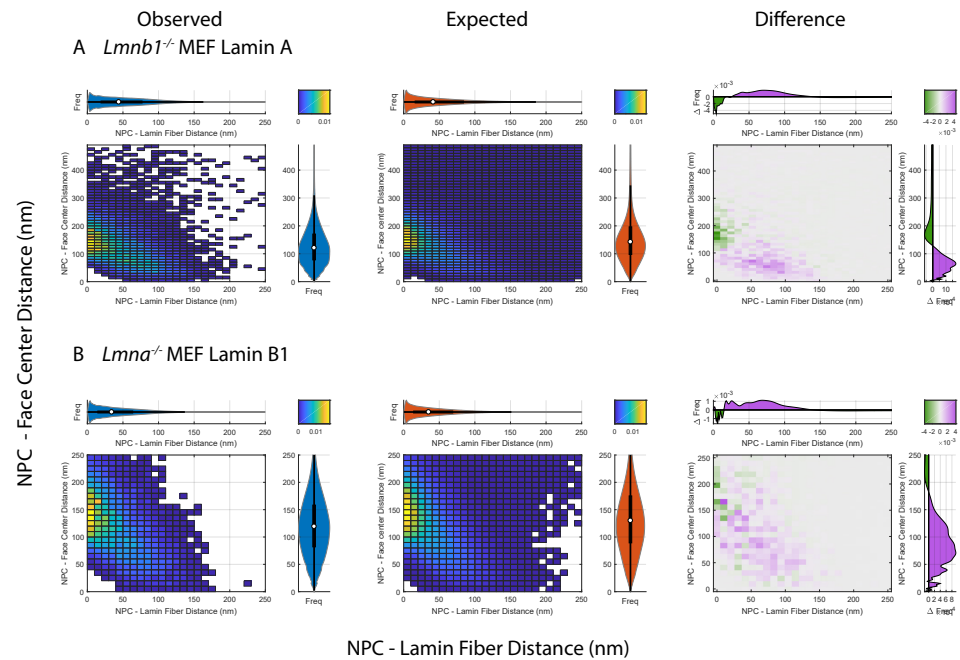

**Legend** A) First row corresponds NPC to Lamin A fiber and face center distances in *Lmnb1*<sup>-/-</sup> MEFs. B) Second row shows NPC to Lamin B1 fiber and face center distances in *Lmna*<sup>-/-</sup> MEFs. Columns are as in Figure 3 – Figure Supplement 1.

**Figure 3-Figure supplement 2.** Bivariate histograms of *Lmnb1*<sup>-/-</sup> and *Lmna*<sup>-/-</sup> MEFs

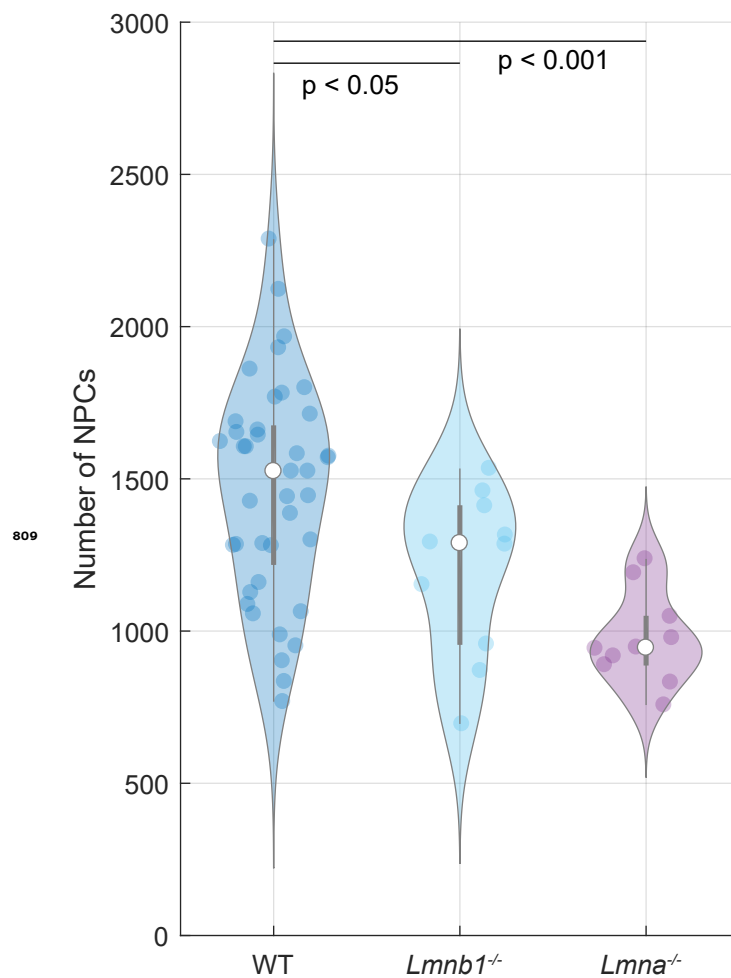

**Figure 3–Figure supplement 3.** Violin plots comparing the number of NPCs detected in WT *Lmna*<sup>-/-</sup> and *Lmnb1*<sup>-/-</sup> MEFs



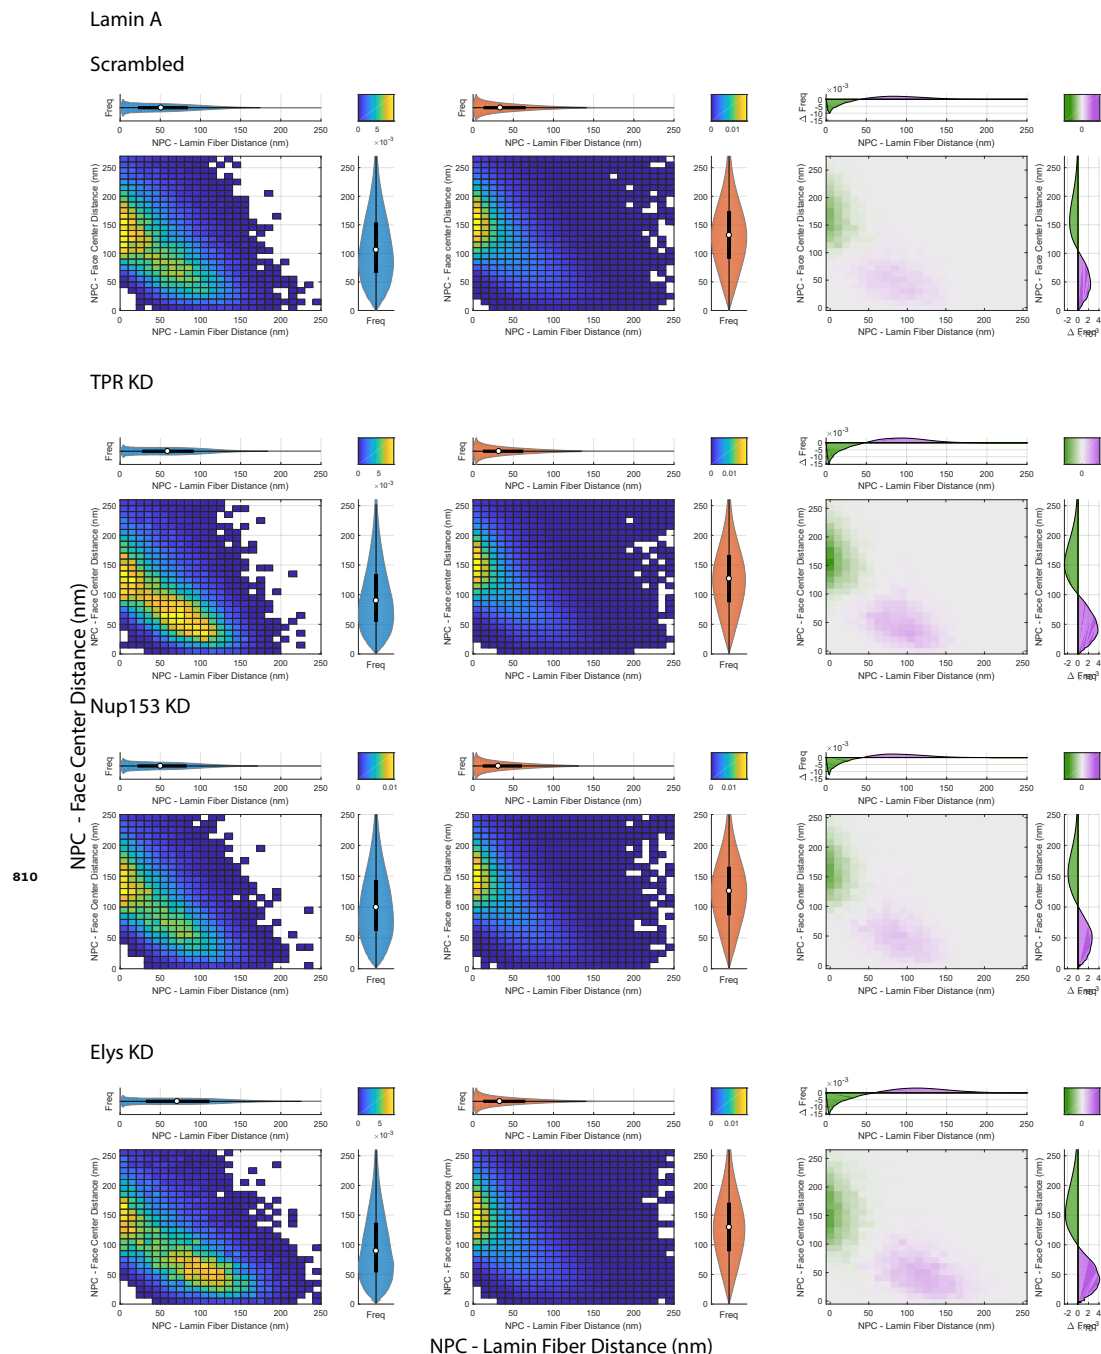

**Legend** A) First row shows a bivariate distribution of NPC to Lamin A fiber and face center distances in WT MEFs after scramble siRNA. B) Second row shows the same with siRNA knockdown of TPR. C) Third row shows the same with siRNA knockdown of Nup153. D) Fourth row shows the same with siRNA knockdown of Elys. First column represents the observed bivariate distribution. Second column represents the expected bivariate distribution. Third column represents the difference between expected and observed. Difference between the observed and expected distance distributions with purple indicating where the observed exceeds the expected frequency and green showing when the observed frequency is less than the expected frequency. Marginal violin plots and box plots of the distances correspond with the half-violin plot counterparts of the same orientation and color as in Panels B-E of the main figure.

**Figure 5-Figure supplement 1.** Bivariate histograms of LA Fiber-NPC and Face Center-NPC Distances

### A NUP153 KD 75-90%

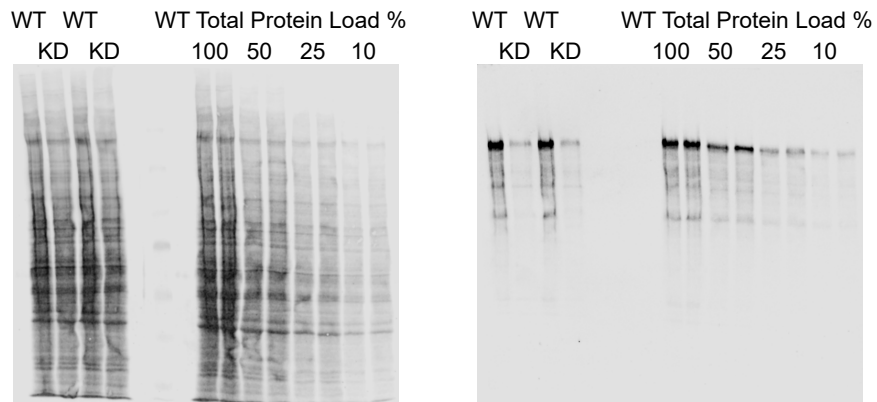

### B ELYS KD 50 - 60%

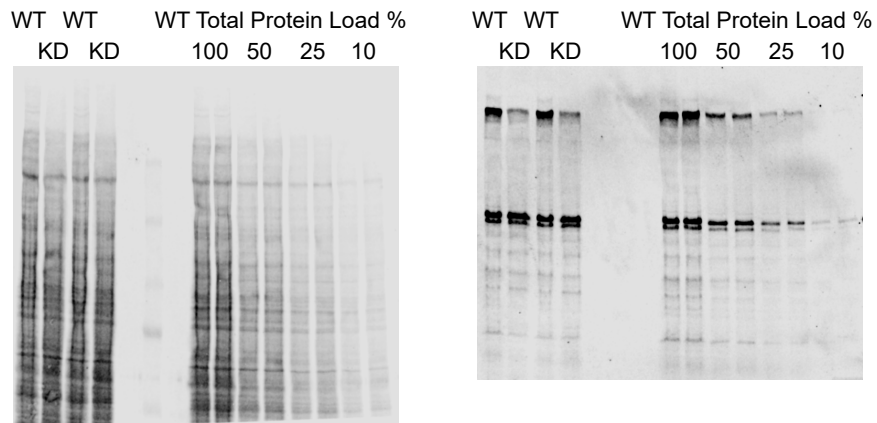

811

### C TPR KD ~40%

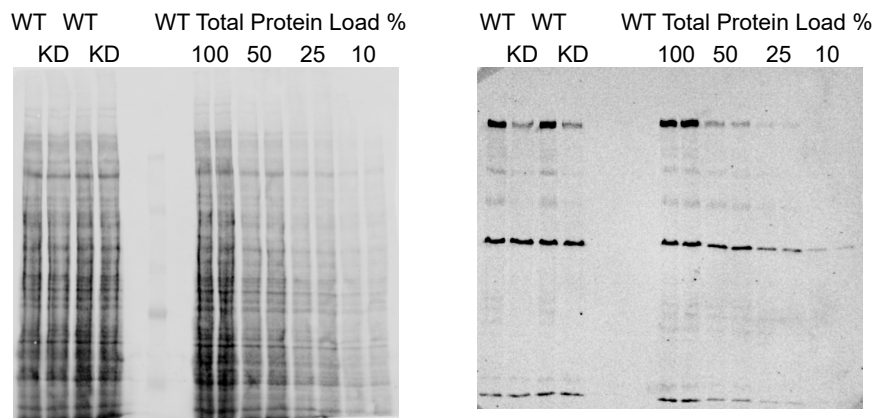

**Legend** siRNA knockdowns were carried out and quantified as described in Materials and Methods. The panels on the left are the total protein stains of the immunoblots with each sample loaded in duplicate. The panels on the right are the immunoblots for each antibody A) NUP153, B) ELYS, C) TPR. The degree of knockdown for each protein was determined by quantifying the average intensity of each duplicate after correction for protein load and comparison to the dilution series of the total protein load from WT cells.

**Figure 5-Figure supplement 2.** Western Blots of ELYS, NUP153, AND TPR siRNA Knockdown Experiments

## Lamin C

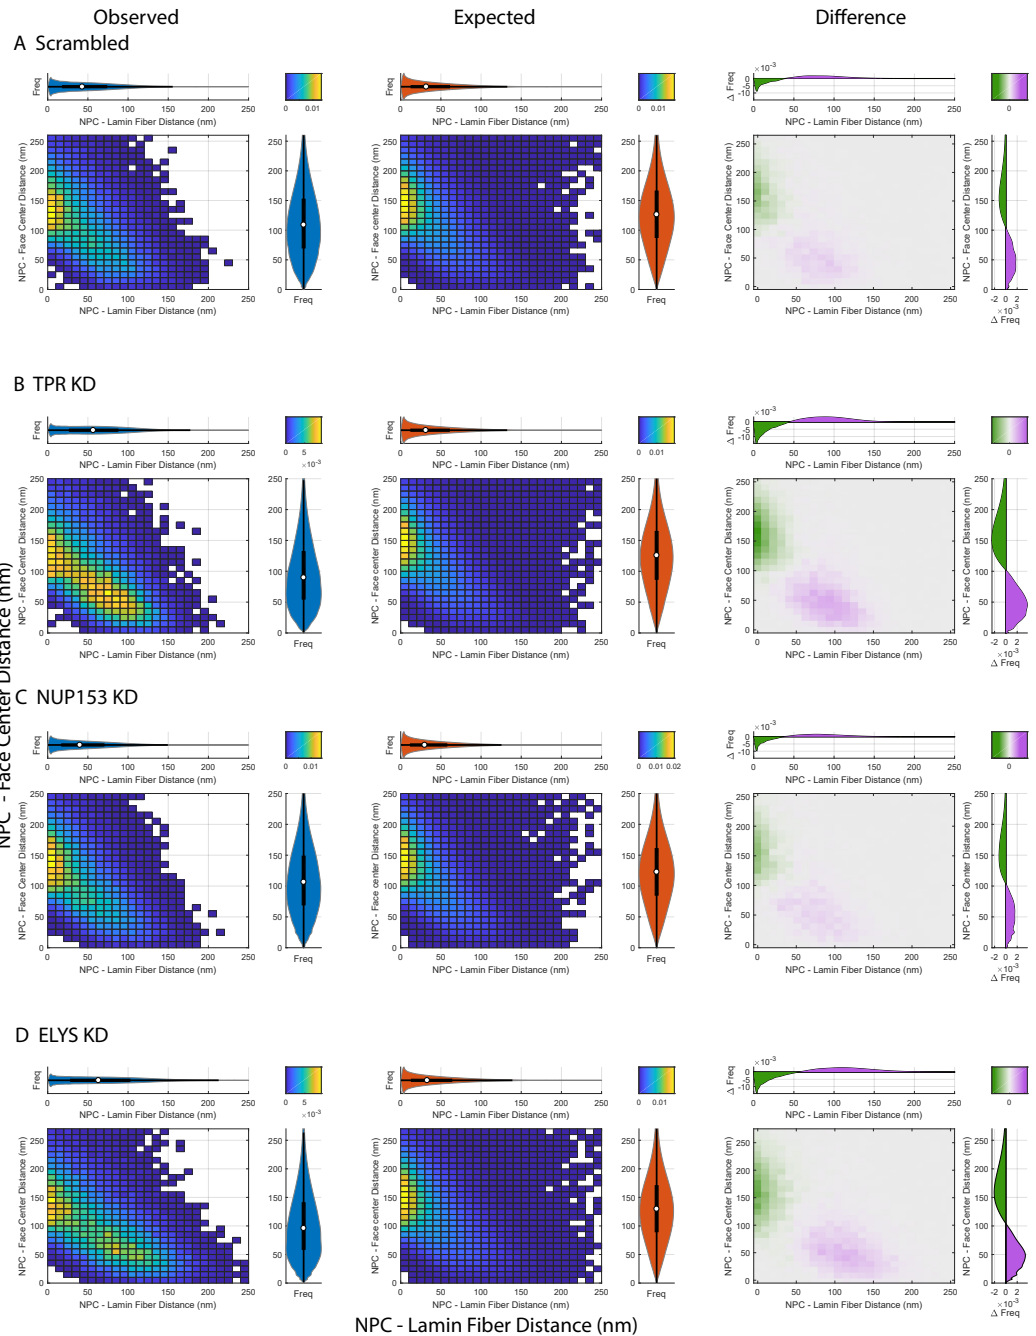

**Legend** A) First row shows a bivariate distribution of NPC to Lamin C fiber and face center distances in WT MEFs after siRNA knockdown with scramble siRNA. B) Second row shows the same with siRNA knockdown of TPR. C) Third row shows the same with siRNA knockdown of Nup153. D) Fourth row shows the same with siRNA knockdown of Elys. First column represents the observed bivariate distribution. Second column represents the expected bivariate distribution. Third column represents the difference between expected and observed. Difference between the observed and expected distance distributions with purple indicating where the observed exceeds the expected frequency and green showing when the observed frequency is less than the expected frequency. Marginal violin plots and box plots of the distances correspond with the half-violin plot counterparts of the same orientation and color as in Panels B-E of the main figure.

**Figure 6-Figure supplement 1.** Bivariate histograms of LC Fiber-NPC and Face Center-NPC Distances



## Lamin B2

Observed

Expected

Difference

A Scrambled

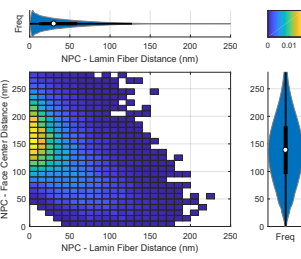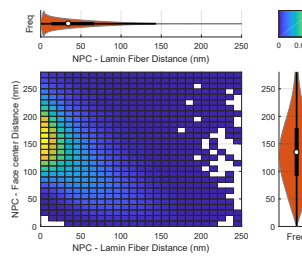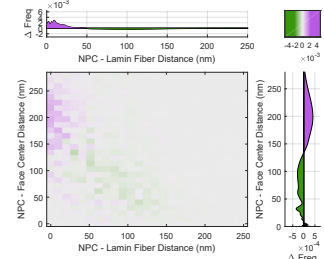

B TPR KD

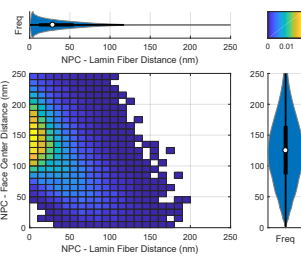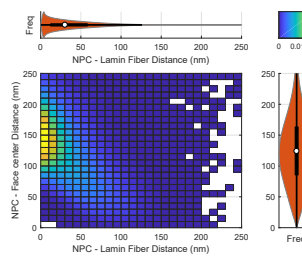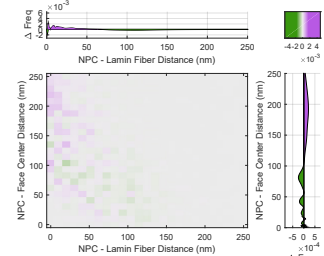

C NUP153 KD

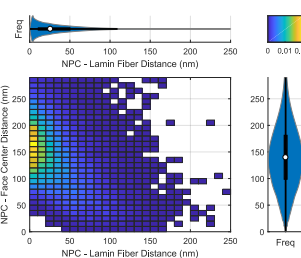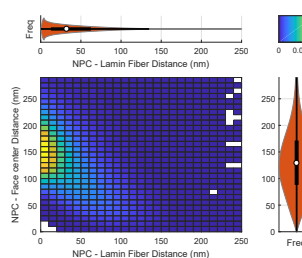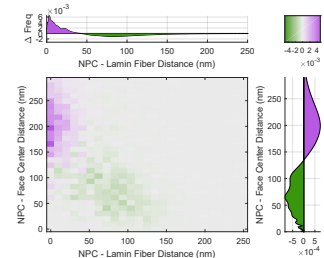

D ELYS KD

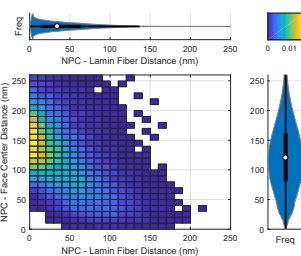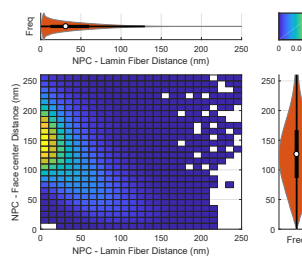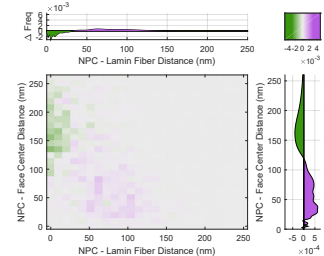

NPC - Lamin Fiber Distance (nm)

**Legend** A) First row shows a bivariate distribution of NPC to Lamin B2 fiber and face center distances in WT MEFs after siRNA knockdown with scramble siRNA. B) Second row shows the same with siRNA knockdown of TPR. C) Third row shows the same with siRNA knockdown of Nup153. D) Fourth row shows the same with siRNA knockdown of Elys. First column represents the observed bivariate distribution. Second column represents the expected bivariate distribution. Third column represents the difference between expected and observed. Difference between the observed and expected distance distributions with purple indicating where the observed exceeds the expected frequency and green showing when the observed frequency is less than the expected frequency. Marginal violin plots and box plots of the distances correspond with the half-violin plot counterparts of the same orientation and color as in Panels B-E of the main figure.

**Figure 8-Figure supplement 1.** Bivariate histograms of LB2 Fiber-NPC and Face Center-NPC Distances

814

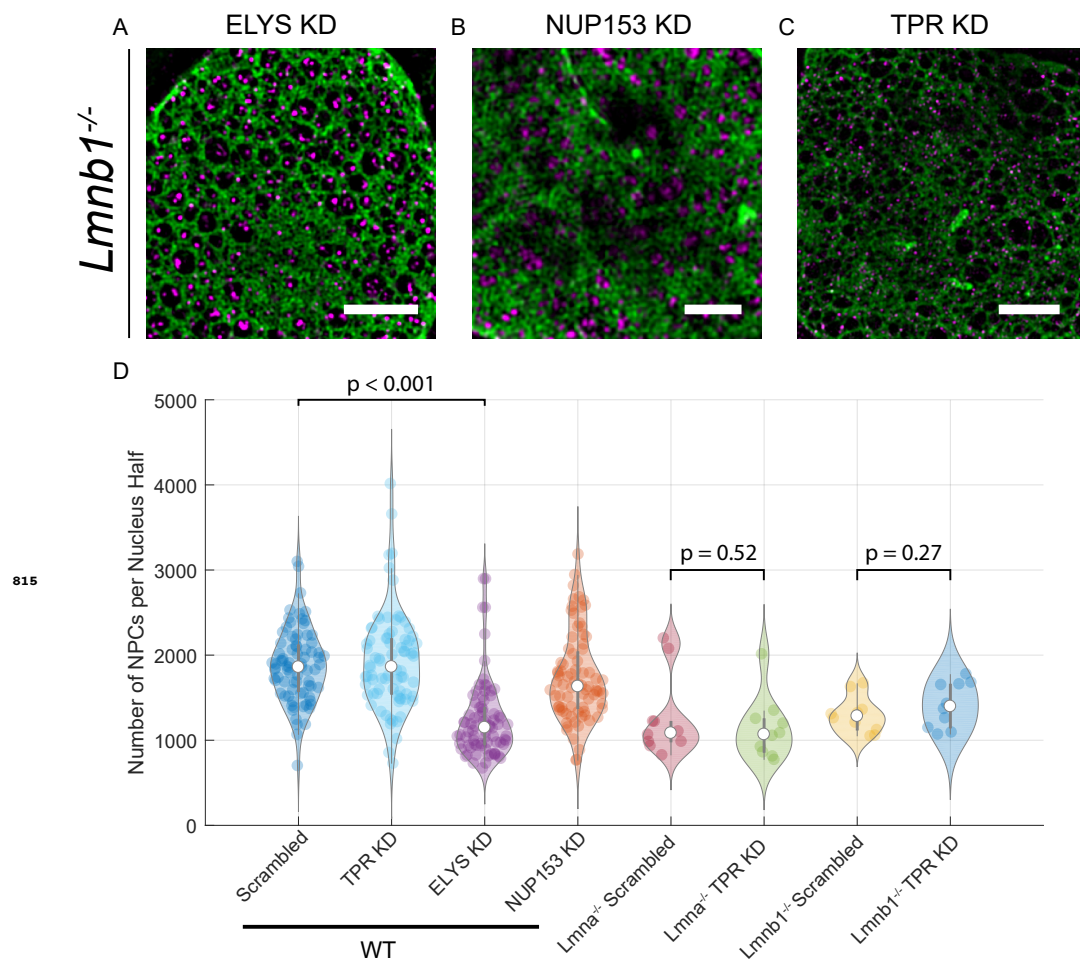

**Legend** A-C) *Lmnb1*<sup>-/-</sup> MEFs A) ELYS knockdown, B) NUP153 knockdown, C) TPR knockdown, D) Number of NPCs per half MEF nuclei in a single focal plane in WT MEFs after ELYS, NUP153, and TPR knockdown. Scale Bar = 10 μm

**Figure 8-Figure supplement 2.** Effect of ELYS, NUP153, and TPR KD in *Lmnb1*<sup>-/-</sup> and *Lmna*<sup>-/-</sup> MEFs
